# Supplementary material for: Statistical optimization of hydrazone-crosslinked hyaluronic acid hydrogels for protein delivery
Source: Royal Society of Chemistry journal article supplement (doi:10.1039/d3tb01588b), 2024-01-01
Supplement: d3tb01588b1.pdf [file d3tb01588b1.pdf]

Supplemental Information

## Statistical Optimization of Hydrazone-Crosslinked Hyaluronic Acid Hydrogels for Protein Delivery

Esther A. Mozipo,<sup>1,2\*</sup> Alycia, N. Galindo,<sup>1\*</sup> Jenna D. Khachatourian,<sup>1,3</sup> Conor G. Harris,<sup>4</sup> Jonathan Dorogin,<sup>1</sup> Veronica R. Spaulding,<sup>2</sup> Madeleine R. Ford,<sup>1,3</sup> Malvika Singhal,<sup>1,2,5</sup> Kaitlin C. Fogg,<sup>4</sup> Marian H. Hettiaratchi<sup>1,2,5#</sup>

1. Phil and Penny Knight Campus for Accelerating Scientific Impact, University of Oregon, Eugene, OR
2. Department of Chemistry and Biochemistry, University of Oregon, Eugene, OR
3. Department of Human Physiology, University of Oregon, Eugene, OR
4. School of Chemical, Biological, and Environmental Engineering, Oregon State University, Corvallis, OR
5. Institute of Molecular Biology, University of Oregon, Eugene, OR

\* These authors contributed equally to this work.

# Correspondence to: [mhettiar@uoregon.edu](mailto:mhettiar@uoregon.edu)

### Degree of Modification

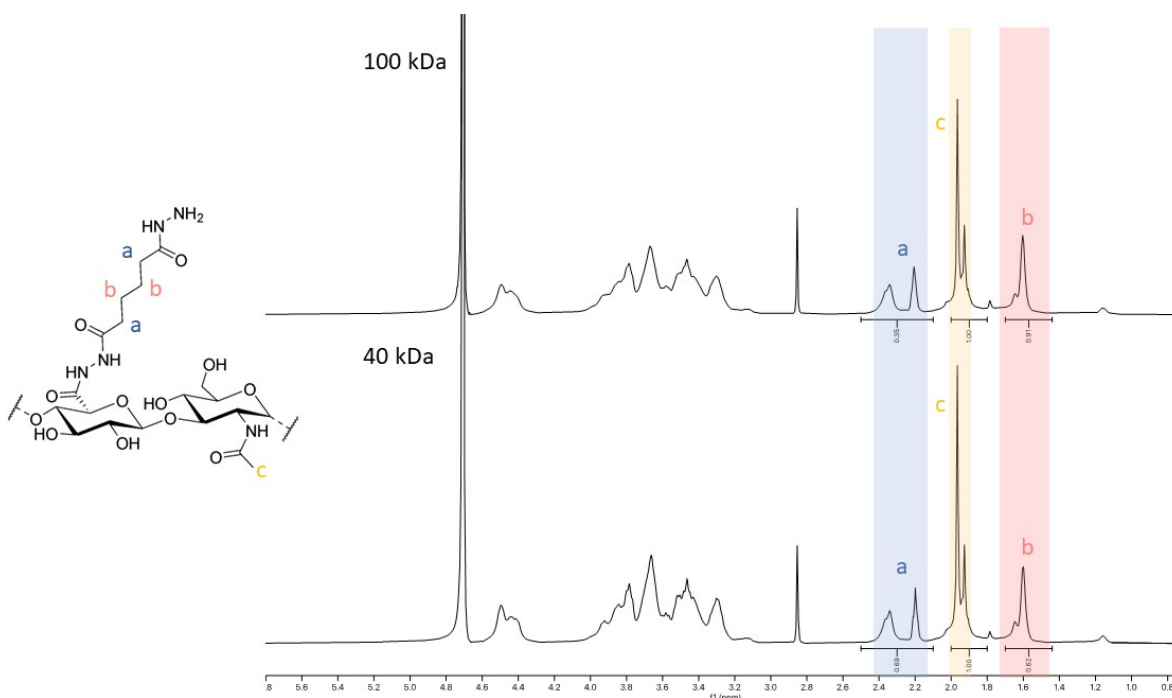

**Figure S1.** <sup>1</sup>H NMR of 40 kDa and 100 kDa HA-ADH. HA-ADH functionalization was confirmed by <sup>1</sup>H NMR. The percentage of ADH functional groups per polymer chain was calculated by integrating the hydrogen peaks from the aliphatic chain on ADH (8H, a-b) and normalizing by the hydrogen peaks from the on the n-actyl group on HA (3H, c).

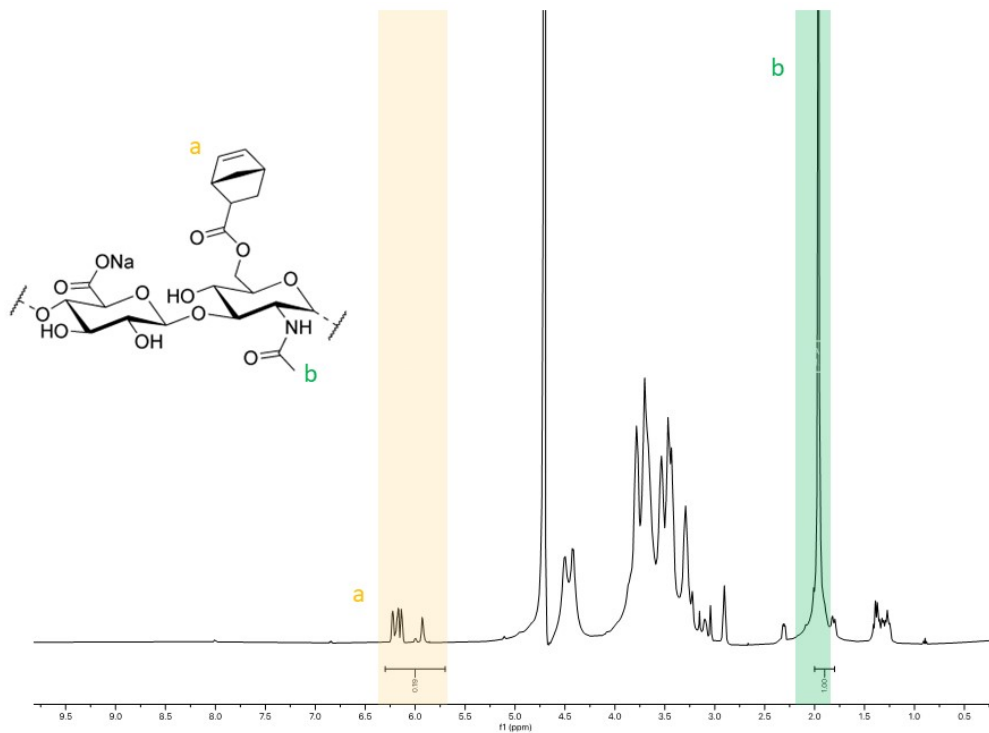

**Figure S2.**  $^1\text{H}$  NMR of HA-Nor. The functionalization of HA-Nor was confirmed by  $^1\text{H}$  NMR. The degree of modification or the percentage of norbornene groups per HA polymer chain was calculated by integrating the vinyl hydrogen peaks on the norbornene functional group (2H, a) and normalizing to the hydrogen peaks from the on the n-acetyl group on HA (3H, b).

| Modification | %Degree of Modification |                     | %Yield              |                     |
|--------------|-------------------------|---------------------|---------------------|---------------------|
|              | 40 kDa                  | 100 kDa             | 40 kDa              | 100 kDa             |
| HA-Ox        | 22.5%                   | 56.0%               | 42.0%               | 68.3%               |
|              | 25.9%                   | 35.5%               | 21.8%               | 89.2%               |
|              | 34.0%                   | 32.6%               | 27.6%               | 83.4%               |
|              | <b>27.5 ± 5.9%</b>      | <b>41.4 ± 12.8%</b> | <b>30.5 ± 10.4%</b> | <b>80.3 ± 10.8%</b> |
| HA-ADH       | 69.3%                   | 45.1%               | 45.1%               | 44.9%               |
|              | 67.5%                   | 52.7%               | 52.7%               | 46.4%               |
|              | 66.8%                   | 40.6%               | 40.6%               | 49.5%               |
|              | 66.9%                   | 63.7%               | 52.8%               | 46.6%               |
|              | <b>67.6 ± 1.2%</b>      | <b>50.6 ± 10.1%</b> | <b>47.8 ± 6.0%</b>  | <b>46.8 ± 1.9%</b>  |
| HA-Nor       | -                       | 30.0%               | -                   | 34.0%               |
|              | -                       | 27.0%               | -                   | 54.0%               |
|              | -                       | 33.3%               | -                   | 31.0%               |
|              | -                       | <b>30.1 ± 3.2%</b>  | -                   | <b>38.7 ± 12.5%</b> |

**Table S1.** Degree of Modification and Yield for Functionalized HA Polymers. A summary of the average degrees of modification and average yields for each functionalized HA polymer, including HA-Ox, HA-ADH, and HA-Nor.

Molecular Weight of Unmodified and Modified HA

| Modification | Number Molecular Weight, M <sub>n</sub> (Da) |                        | Average Molecular Weight, M <sub>w</sub> (Da) |                        | Polydispersity Index (PDI) |                        |
|--------------|----------------------------------------------|------------------------|-----------------------------------------------|------------------------|----------------------------|------------------------|
|              | 40 kDa                                       | 100 kDa                | 40 kDa                                        | 100 kDa                | 40 kDa                     | 100 kDa                |
| HA           | 34,912                                       | 76,797                 | 62,776                                        | 131,134                | 1.798                      | 1.708                  |
|              | 37,549                                       | 72,300                 | 62,123                                        | 128,996                | 1.654                      | 1.784                  |
|              | 36,438                                       | 78,179                 | 61,823                                        | 132,258                | 1.697                      | 1.692                  |
|              | <b>36,300 ± 1,081</b>                        | <b>75,759 ± 2,510</b>  | <b>62,241 ± 398</b>                           | <b>130,796 ± 1,353</b> | <b>1.716 ± 0.060</b>       | <b>1.728 ± 0.040</b>   |
| HA-Ox        | 19,284                                       | 46,061                 | 31,778                                        | 85,120                 | 1.648                      | 1.848                  |
|              | 18,922                                       | 47,872                 | 31,907                                        | 85,328                 | 1.686                      | 1.782                  |
|              | 20,029                                       | 43,046                 | 31,853                                        | 80,005                 | 1.590                      | 1.859                  |
|              | <b>19,412 ± 461</b>                          | <b>45,660 ± 1,991</b>  | <b>31,846 ± 53</b>                            | <b>83,484 ± 2,462</b>  | <b>1.641 ± 0.039</b>       | <b>1.830 ± 0.034</b>   |
| HA-ADH       | 112,437                                      | 113,363                | 376,002                                       | 267,904                | 1.9878                     | 2.1431                 |
|              | 111,212                                      | 123,308                | 381,266                                       | 290,938                | 2.0184                     | 2.3186                 |
|              | 107,304                                      | 109,823                | 343,204                                       | 283,265                | 2.0553                     | 2.0860                 |
|              | <b>110,318 ± 2,189</b>                       | <b>115,498 ± 5,708</b> | <b>366,824 ± 16,840</b>                       | <b>280,702 ± 9,577</b> | <b>2.0205 ± 0.0276</b>     | <b>2.1826 ± 0.0990</b> |

**Table S2. HA polymer molecular weight.** Molecular weights of unmodified and modified HA were determined by gel permeation chromatography. N=3.

Statistical Analysis of Gelation Time

| Gelation Time Significance                                                                                       |         |                  |
|------------------------------------------------------------------------------------------------------------------|---------|------------------|
| Dunnett's T3 multiple comparisons test                                                                           | Summary | Adjusted P Value |
| HA-ADH <sub>1.00</sub> HA-Ox <sub>1.00</sub> (40 kDa) vs. HA-ADH <sub>3.00</sub> HA-Ox <sub>1.00</sub> (40 kDa)  | ****    | <0.0001          |
| HA-ADH <sub>1.00</sub> HA-Ox <sub>1.00</sub> (40 kDa) vs. HA-ADH <sub>1.00</sub> HA-Ox <sub>3.00</sub> (40 kDa)  | ***     | 0.0005           |
| HA-ADH <sub>1.00</sub> HA-Ox <sub>1.00</sub> (40 kDa) vs. HA-ADH <sub>3.00</sub> HA-Ox <sub>3.00</sub> (40 kDa)  | ****    | <0.0001          |
| HA-ADH <sub>1.00</sub> HA-Ox <sub>1.00</sub> (40 kDa) vs. HA-ADH <sub>1.67</sub> HA-Ox <sub>1.00</sub> (40 kDa)  | **      | 0.0043           |
| HA-ADH <sub>1.00</sub> HA-Ox <sub>1.00</sub> (40 kDa) vs. HA-ADH <sub>2.00</sub> HA-Ox <sub>2.00</sub> (40 kDa)  | **      | 0.0026           |
| HA-ADH <sub>1.00</sub> HA-Ox <sub>1.00</sub> (40 kDa) vs. HA-ADH <sub>1.00</sub> HA-Ox <sub>1.00</sub> (100 kDa) | ****    | <0.0001          |
| HA-ADH <sub>1.00</sub> HA-Ox <sub>1.00</sub> (40 kDa) vs. HA-ADH <sub>3.00</sub> HA-Ox <sub>1.00</sub> (100 kDa) | ****    | <0.0001          |
| HA-ADH <sub>1.00</sub> HA-Ox <sub>1.00</sub> (40 kDa) vs. HA-ADH <sub>1.00</sub> HA-Ox <sub>3.00</sub> (100 kDa) | ***     | 0.0002           |
| HA-ADH <sub>1.00</sub> HA-Ox <sub>1.00</sub> (40 kDa) vs. HA-ADH <sub>3.00</sub> HA-Ox <sub>3.00</sub> (100 kDa) | ****    | <0.0001          |
| HA-ADH <sub>1.00</sub> HA-Ox <sub>1.00</sub> (40 kDa) vs. HA-ADH <sub>1.00</sub> HA-Ox <sub>1.67</sub> (100 kDa) | ****    | <0.0001          |
| HA-ADH <sub>1.00</sub> HA-Ox <sub>1.00</sub> (40 kDa) vs. HA-ADH <sub>3.00</sub> HA-Ox <sub>2.33</sub> (100 kDa) | ****    | <0.0001          |
| HA-ADH <sub>1.00</sub> HA-Ox <sub>1.00</sub> (40 kDa) vs. HA-ADH <sub>2.33</sub> HA-Ox <sub>1.00</sub> (100 kDa) | ***     | 0.0005           |
| HA-ADH <sub>1.00</sub> HA-Ox <sub>1.00</sub> (40 kDa) vs. HA-ADH <sub>1.67</sub> HA-Ox <sub>3.00</sub> (100 kDa) | ***     | 0.0005           |
| HA-ADH <sub>1.00</sub> HA-Ox <sub>1.00</sub> (40 kDa) vs. HA-ADH <sub>2.00</sub> HA-Ox <sub>2.00</sub> (100 kDa) | ****    | <0.0001          |
| HA-ADH <sub>3.00</sub> HA-Ox <sub>1.00</sub> (40 kDa) vs. HA-ADH <sub>1.00</sub> HA-Ox <sub>3.00</sub> (40 kDa)  | ns      | 0.3702           |

|                                                                                                                  |      |         |
|------------------------------------------------------------------------------------------------------------------|------|---------|
| HA-ADH <sub>3.00</sub> HA-Ox <sub>1.00</sub> (40 kDa) vs. HA-ADH <sub>3.00</sub> HA-Ox <sub>3.00</sub> (40 kDa)  | ***  | 0.0002  |
| HA-ADH <sub>3.00</sub> HA-Ox <sub>1.00</sub> (40 kDa) vs. HA-ADH <sub>1.67</sub> HA-Ox <sub>1.00</sub> (40 kDa)  | **   | 0.0048  |
| HA-ADH <sub>3.00</sub> HA-Ox <sub>1.00</sub> (40 kDa) vs. HA-ADH <sub>2.00</sub> HA-Ox <sub>2.00</sub> (40 kDa)  | ns   | 0.0888  |
| HA-ADH <sub>3.00</sub> HA-Ox <sub>1.00</sub> (40 kDa) vs. HA-ADH <sub>1.00</sub> HA-Ox <sub>1.00</sub> (100 kDa) | ***  | 0.0004  |
| HA-ADH <sub>3.00</sub> HA-Ox <sub>1.00</sub> (40 kDa) vs. HA-ADH <sub>3.00</sub> HA-Ox <sub>1.00</sub> (100 kDa) | **   | 0.0021  |
| HA-ADH <sub>3.00</sub> HA-Ox <sub>1.00</sub> (40 kDa) vs. HA-ADH <sub>1.00</sub> HA-Ox <sub>3.00</sub> (100 kDa) | **   | 0.0027  |
| HA-ADH <sub>3.00</sub> HA-Ox <sub>1.00</sub> (40 kDa) vs. HA-ADH <sub>3.00</sub> HA-Ox <sub>3.00</sub> (100 kDa) | **   | 0.0018  |
| HA-ADH <sub>3.00</sub> HA-Ox <sub>1.00</sub> (40 kDa) vs. HA-ADH <sub>1.00</sub> HA-Ox <sub>1.67</sub> (100 kDa) | ns   | >0.9999 |
| HA-ADH <sub>3.00</sub> HA-Ox <sub>1.00</sub> (40 kDa) vs. HA-ADH <sub>3.00</sub> HA-Ox <sub>2.33</sub> (100 kDa) | ***  | 0.0002  |
| HA-ADH <sub>3.00</sub> HA-Ox <sub>1.00</sub> (40 kDa) vs. HA-ADH <sub>2.33</sub> HA-Ox <sub>1.00</sub> (100 kDa) | *    | 0.0335  |
| HA-ADH <sub>3.00</sub> HA-Ox <sub>1.00</sub> (40 kDa) vs. HA-ADH <sub>1.67</sub> HA-Ox <sub>3.00</sub> (100 kDa) | *    | 0.0427  |
| HA-ADH <sub>3.00</sub> HA-Ox <sub>1.00</sub> (40 kDa) vs. HA-ADH <sub>2.00</sub> HA-Ox <sub>2.00</sub> (100 kDa) | **** | <0.0001 |
| HA-ADH <sub>1.00</sub> HA-Ox <sub>3.00</sub> (40 kDa) vs. HA-ADH <sub>3.00</sub> HA-Ox <sub>3.00</sub> (40 kDa)  | *    | 0.0246  |
| HA-ADH <sub>1.00</sub> HA-Ox <sub>3.00</sub> (40 kDa) vs. HA-ADH <sub>1.67</sub> HA-Ox <sub>1.00</sub> (40 kDa)  | **** | <0.0001 |
| HA-ADH <sub>1.00</sub> HA-Ox <sub>3.00</sub> (40 kDa) vs. HA-ADH <sub>2.00</sub> HA-Ox <sub>2.00</sub> (40 kDa)  | *    | 0.0269  |
| HA-ADH <sub>1.00</sub> HA-Ox <sub>3.00</sub> (40 kDa) vs. HA-ADH <sub>1.00</sub> HA-Ox <sub>1.00</sub> (100 kDa) | *    | 0.0359  |
| HA-ADH <sub>1.00</sub> HA-Ox <sub>3.00</sub> (40 kDa) vs. HA-ADH <sub>3.00</sub> HA-Ox <sub>1.00</sub> (100 kDa) | *    | 0.0252  |
| HA-ADH <sub>1.00</sub> HA-Ox <sub>3.00</sub> (40 kDa) vs. HA-ADH <sub>1.00</sub> HA-Ox <sub>3.00</sub> (100 kDa) | *    | 0.0305  |
| HA-ADH <sub>1.00</sub> HA-Ox <sub>3.00</sub> (40 kDa) vs. HA-ADH <sub>3.00</sub> HA-Ox <sub>3.00</sub> (100 kDa) | *    | 0.0206  |
| HA-ADH <sub>1.00</sub> HA-Ox <sub>3.00</sub> (40 kDa) vs. HA-ADH <sub>1.00</sub> HA-Ox <sub>1.67</sub> (100 kDa) | ns   | 0.3194  |
| HA-ADH <sub>1.00</sub> HA-Ox <sub>3.00</sub> (40 kDa) vs. HA-ADH <sub>3.00</sub> HA-Ox <sub>2.33</sub> (100 kDa) | *    | 0.0243  |
| HA-ADH <sub>1.00</sub> HA-Ox <sub>3.00</sub> (40 kDa) vs. HA-ADH <sub>2.33</sub> HA-Ox <sub>1.00</sub> (100 kDa) | *    | 0.0204  |
| HA-ADH <sub>1.00</sub> HA-Ox <sub>3.00</sub> (40 kDa) vs. HA-ADH <sub>1.67</sub> HA-Ox <sub>3.00</sub> (100 kDa) | *    | 0.0327  |
| HA-ADH <sub>1.00</sub> HA-Ox <sub>3.00</sub> (40 kDa) vs. HA-ADH <sub>2.00</sub> HA-Ox <sub>2.00</sub> (100 kDa) | *    | 0.0465  |
| HA-ADH <sub>3.00</sub> HA-Ox <sub>3.00</sub> (40 kDa) vs. HA-ADH <sub>1.67</sub> HA-Ox <sub>1.00</sub> (40 kDa)  | **   | 0.0024  |
| HA-ADH <sub>3.00</sub> HA-Ox <sub>3.00</sub> (40 kDa) vs. HA-ADH <sub>2.00</sub> HA-Ox <sub>2.00</sub> (40 kDa)  | *    | 0.0173  |
| HA-ADH <sub>3.00</sub> HA-Ox <sub>3.00</sub> (40 kDa) vs. HA-ADH <sub>1.00</sub> HA-Ox <sub>1.00</sub> (100 kDa) | **** | <0.0001 |
| HA-ADH <sub>3.00</sub> HA-Ox <sub>3.00</sub> (40 kDa) vs. HA-ADH <sub>3.00</sub> HA-Ox <sub>1.00</sub> (100 kDa) | ns   | 0.8765  |
| HA-ADH <sub>3.00</sub> HA-Ox <sub>3.00</sub> (40 kDa) vs. HA-ADH <sub>1.00</sub> HA-Ox <sub>3.00</sub> (100 kDa) | ns   | 0.0698  |
| HA-ADH <sub>3.00</sub> HA-Ox <sub>3.00</sub> (40 kDa) vs. HA-ADH <sub>3.00</sub> HA-Ox <sub>3.00</sub> (100 kDa) | *    | 0.0367  |
| HA-ADH <sub>3.00</sub> HA-Ox <sub>3.00</sub> (40 kDa) vs. HA-ADH <sub>1.00</sub> HA-Ox <sub>1.67</sub> (100 kDa) | **** | <0.0001 |
| HA-ADH <sub>3.00</sub> HA-Ox <sub>3.00</sub> (40 kDa) vs. HA-ADH <sub>3.00</sub> HA-Ox <sub>2.33</sub> (100 kDa) | ns   | >0.9999 |
| HA-ADH <sub>3.00</sub> HA-Ox <sub>3.00</sub> (40 kDa) vs. HA-ADH <sub>2.33</sub> HA-Ox <sub>1.00</sub> (100 kDa) | ns   | 0.2687  |
| HA-ADH <sub>3.00</sub> HA-Ox <sub>3.00</sub> (40 kDa) vs. HA-ADH <sub>1.67</sub> HA-Ox <sub>3.00</sub> (100 kDa) | ns   | 0.2078  |
| HA-ADH <sub>3.00</sub> HA-Ox <sub>3.00</sub> (40 kDa) vs. HA-ADH <sub>2.00</sub> HA-Ox <sub>2.00</sub> (100 kDa) | **** | <0.0001 |
| HA-ADH <sub>1.67</sub> HA-Ox <sub>1.00</sub> (40 kDa) vs. HA-ADH <sub>2.00</sub> HA-Ox <sub>2.00</sub> (40 kDa)  | **   | 0.0013  |
| HA-ADH <sub>1.67</sub> HA-Ox <sub>1.00</sub> (40 kDa) vs. HA-ADH <sub>1.00</sub> HA-Ox <sub>1.00</sub> (100 kDa) | **   | 0.0072  |
| HA-ADH <sub>1.67</sub> HA-Ox <sub>1.00</sub> (40 kDa) vs. HA-ADH <sub>3.00</sub> HA-Ox <sub>1.00</sub> (100 kDa) | **   | 0.0024  |
| HA-ADH <sub>1.67</sub> HA-Ox <sub>1.00</sub> (40 kDa) vs. HA-ADH <sub>1.00</sub> HA-Ox <sub>3.00</sub> (100 kDa) | ***  | 0.0003  |

|                                                                                                                   |      |         |
|-------------------------------------------------------------------------------------------------------------------|------|---------|
| HA-ADH <sub>1.67</sub> HA-Ox <sub>1.00</sub> (40 kDa) vs. HA-ADH <sub>3.00</sub> HA-Ox <sub>3.00</sub> (100 kDa)  | **   | 0.0023  |
| HA-ADH <sub>1.67</sub> HA-Ox <sub>1.00</sub> (40 kDa) vs. HA-ADH <sub>1.00</sub> HA-Ox <sub>1.67</sub> (100 kDa)  | **   | 0.0047  |
| HA-ADH <sub>1.67</sub> HA-Ox <sub>1.00</sub> (40 kDa) vs. HA-ADH <sub>3.00</sub> HA-Ox <sub>2.33</sub> (100 kDa)  | **   | 0.0024  |
| HA-ADH <sub>1.67</sub> HA-Ox <sub>1.00</sub> (40 kDa) vs. HA-ADH <sub>2.33</sub> HA-Ox <sub>1.00</sub> (100 kDa)  | **** | <0.0001 |
| HA-ADH <sub>1.67</sub> HA-Ox <sub>1.00</sub> (40 kDa) vs. HA-ADH <sub>1.67</sub> HA-Ox <sub>3.00</sub> (100 kDa)  | **** | <0.0001 |
| HA-ADH <sub>1.67</sub> HA-Ox <sub>1.00</sub> (40 kDa) vs. HA-ADH <sub>2.00</sub> HA-Ox <sub>2.00</sub> (100 kDa)  | **   | 0.0033  |
| HA-ADH <sub>2.00</sub> HA-Ox <sub>2.00</sub> (40 kDa) vs. HA-ADH <sub>1.00</sub> HA-Ox <sub>1.00</sub> (100 kDa)  | ns   | 0.4885  |
| HA-ADH <sub>2.00</sub> HA-Ox <sub>2.00</sub> (40 kDa) vs. HA-ADH <sub>3.00</sub> HA-Ox <sub>1.00</sub> (100 kDa)  | *    | 0.0176  |
| HA-ADH <sub>2.00</sub> HA-Ox <sub>2.00</sub> (40 kDa) vs. HA-ADH <sub>1.00</sub> HA-Ox <sub>3.00</sub> (100 kDa)  | *    | 0.027   |
| HA-ADH <sub>2.00</sub> HA-Ox <sub>2.00</sub> (40 kDa) vs. HA-ADH <sub>3.00</sub> HA-Ox <sub>3.00</sub> (100 kDa)  | *    | 0.016   |
| HA-ADH <sub>2.00</sub> HA-Ox <sub>2.00</sub> (40 kDa) vs. HA-ADH <sub>1.00</sub> HA-Ox <sub>1.67</sub> (100 kDa)  | ns   | 0.0889  |
| HA-ADH <sub>2.00</sub> HA-Ox <sub>2.00</sub> (40 kDa) vs. HA-ADH <sub>3.00</sub> HA-Ox <sub>2.33</sub> (100 kDa)  | *    | 0.0172  |
| HA-ADH <sub>2.00</sub> HA-Ox <sub>2.00</sub> (40 kDa) vs. HA-ADH <sub>2.33</sub> HA-Ox <sub>1.00</sub> (100 kDa)  | **   | 0.0074  |
| HA-ADH <sub>2.00</sub> HA-Ox <sub>2.00</sub> (40 kDa) vs. HA-ADH <sub>1.67</sub> HA-Ox <sub>3.00</sub> (100 kDa)  | **   | 0.0086  |
| HA-ADH <sub>2.00</sub> HA-Ox <sub>2.00</sub> (40 kDa) vs. HA-ADH <sub>2.00</sub> HA-Ox <sub>2.00</sub> (100 kDa)  | *    | 0.0297  |
| HA-ADH <sub>1.00</sub> HA-Ox <sub>1.00</sub> (100 kDa) vs. HA-ADH <sub>3.00</sub> HA-Ox <sub>1.00</sub> (100 kDa) | ***  | 0.0008  |
| HA-ADH <sub>1.00</sub> HA-Ox <sub>1.00</sub> (100 kDa) vs. HA-ADH <sub>1.00</sub> HA-Ox <sub>3.00</sub> (100 kDa) | ***  | 0.0005  |
| HA-ADH <sub>1.00</sub> HA-Ox <sub>1.00</sub> (100 kDa) vs. HA-ADH <sub>3.00</sub> HA-Ox <sub>3.00</sub> (100 kDa) | ***  | 0.0007  |
| HA-ADH <sub>1.00</sub> HA-Ox <sub>1.00</sub> (100 kDa) vs. HA-ADH <sub>1.00</sub> HA-Ox <sub>1.67</sub> (100 kDa) | **   | 0.0012  |
| HA-ADH <sub>1.00</sub> HA-Ox <sub>1.00</sub> (100 kDa) vs. HA-ADH <sub>3.00</sub> HA-Ox <sub>2.33</sub> (100 kDa) | **** | <0.0001 |
| HA-ADH <sub>1.00</sub> HA-Ox <sub>1.00</sub> (100 kDa) vs. HA-ADH <sub>2.33</sub> HA-Ox <sub>1.00</sub> (100 kDa) | *    | 0.0122  |
| HA-ADH <sub>1.00</sub> HA-Ox <sub>1.00</sub> (100 kDa) vs. HA-ADH <sub>1.67</sub> HA-Ox <sub>3.00</sub> (100 kDa) | *    | 0.0147  |
| HA-ADH <sub>1.00</sub> HA-Ox <sub>1.00</sub> (100 kDa) vs. HA-ADH <sub>2.00</sub> HA-Ox <sub>2.00</sub> (100 kDa) | **** | <0.0001 |
| HA-ADH <sub>3.00</sub> HA-Ox <sub>1.00</sub> (100 kDa) vs. HA-ADH <sub>1.00</sub> HA-Ox <sub>3.00</sub> (100 kDa) | ns   | 0.0748  |
| HA-ADH <sub>3.00</sub> HA-Ox <sub>1.00</sub> (100 kDa) vs. HA-ADH <sub>3.00</sub> HA-Ox <sub>3.00</sub> (100 kDa) | **   | 0.0023  |
| HA-ADH <sub>3.00</sub> HA-Ox <sub>1.00</sub> (100 kDa) vs. HA-ADH <sub>1.00</sub> HA-Ox <sub>1.67</sub> (100 kDa) | **** | <0.0001 |
| HA-ADH <sub>3.00</sub> HA-Ox <sub>1.00</sub> (100 kDa) vs. HA-ADH <sub>3.00</sub> HA-Ox <sub>2.33</sub> (100 kDa) | ns   | 0.657   |
| HA-ADH <sub>3.00</sub> HA-Ox <sub>1.00</sub> (100 kDa) vs. HA-ADH <sub>2.33</sub> HA-Ox <sub>1.00</sub> (100 kDa) | ns   | 0.2964  |
| HA-ADH <sub>3.00</sub> HA-Ox <sub>1.00</sub> (100 kDa) vs. HA-ADH <sub>1.67</sub> HA-Ox <sub>3.00</sub> (100 kDa) | ns   | 0.2257  |
| HA-ADH <sub>3.00</sub> HA-Ox <sub>1.00</sub> (100 kDa) vs. HA-ADH <sub>2.00</sub> HA-Ox <sub>2.00</sub> (100 kDa) | **** | <0.0001 |
| HA-ADH <sub>1.00</sub> HA-Ox <sub>3.00</sub> (100 kDa) vs. HA-ADH <sub>3.00</sub> HA-Ox <sub>3.00</sub> (100 kDa) | *    | 0.0446  |
| HA-ADH <sub>1.00</sub> HA-Ox <sub>3.00</sub> (100 kDa) vs. HA-ADH <sub>1.00</sub> HA-Ox <sub>1.67</sub> (100 kDa) | *    | 0.0121  |
| HA-ADH <sub>1.00</sub> HA-Ox <sub>3.00</sub> (100 kDa) vs. HA-ADH <sub>3.00</sub> HA-Ox <sub>2.33</sub> (100 kDa) | ns   | 0.0674  |
| HA-ADH <sub>1.00</sub> HA-Ox <sub>3.00</sub> (100 kDa) vs. HA-ADH <sub>2.33</sub> HA-Ox <sub>1.00</sub> (100 kDa) | ns   | 0.9998  |
| HA-ADH <sub>1.00</sub> HA-Ox <sub>3.00</sub> (100 kDa) vs. HA-ADH <sub>1.67</sub> HA-Ox <sub>3.00</sub> (100 kDa) | ns   | >0.9999 |
| HA-ADH <sub>1.00</sub> HA-Ox <sub>3.00</sub> (100 kDa) vs. HA-ADH <sub>2.00</sub> HA-Ox <sub>2.00</sub> (100 kDa) | ns   | 0.5425  |
| HA-ADH <sub>3.00</sub> HA-Ox <sub>3.00</sub> (100 kDa) vs. HA-ADH <sub>1.00</sub> HA-Ox <sub>1.67</sub> (100 kDa) | **** | <0.0001 |
| HA-ADH <sub>3.00</sub> HA-Ox <sub>3.00</sub> (100 kDa) vs. HA-ADH <sub>3.00</sub> HA-Ox <sub>2.33</sub> (100 kDa) | *    | 0.0417  |
| HA-ADH <sub>3.00</sub> HA-Ox <sub>3.00</sub> (100 kDa) vs. HA-ADH <sub>2.33</sub> HA-Ox <sub>1.00</sub> (100 kDa) | ns   | 0.1714  |

|                                                                                                                   |      |         |
|-------------------------------------------------------------------------------------------------------------------|------|---------|
| HA-ADH <sub>3.00</sub> HA-Ox <sub>3.00</sub> (100 kDa) vs. HA-ADH <sub>1.67</sub> HA-Ox <sub>3.00</sub> (100 kDa) | ns   | 0.141   |
| HA-ADH <sub>3.00</sub> HA-Ox <sub>3.00</sub> (100 kDa) vs. HA-ADH <sub>2.00</sub> HA-Ox <sub>2.00</sub> (100 kDa) | **** | <0.0001 |
| HA-ADH <sub>1.00</sub> HA-Ox <sub>1.67</sub> (100 kDa) vs. HA-ADH <sub>3.00</sub> HA-Ox <sub>2.33</sub> (100 kDa) | **** | <0.0001 |
| HA-ADH <sub>1.00</sub> HA-Ox <sub>1.67</sub> (100 kDa) vs. HA-ADH <sub>2.33</sub> HA-Ox <sub>1.00</sub> (100 kDa) | *    | 0.0303  |
| HA-ADH <sub>1.00</sub> HA-Ox <sub>1.67</sub> (100 kDa) vs. HA-ADH <sub>1.67</sub> HA-Ox <sub>3.00</sub> (100 kDa) | *    | 0.0389  |
| HA-ADH <sub>1.00</sub> HA-Ox <sub>1.67</sub> (100 kDa) vs. HA-ADH <sub>2.00</sub> HA-Ox <sub>2.00</sub> (100 kDa) | **** | <0.0001 |
| HA-ADH <sub>3.00</sub> HA-Ox <sub>2.33</sub> (100 kDa) vs. HA-ADH <sub>2.33</sub> HA-Ox <sub>1.00</sub> (100 kDa) | ns   | 0.2597  |
| HA-ADH <sub>3.00</sub> HA-Ox <sub>2.33</sub> (100 kDa) vs. HA-ADH <sub>1.67</sub> HA-Ox <sub>3.00</sub> (100 kDa) | ns   | 0.2018  |
| HA-ADH <sub>3.00</sub> HA-Ox <sub>2.33</sub> (100 kDa) vs. HA-ADH <sub>2.00</sub> HA-Ox <sub>2.00</sub> (100 kDa) | **** | <0.0001 |
| HA-ADH <sub>2.33</sub> HA-Ox <sub>1.00</sub> (100 kDa) vs. HA-ADH <sub>1.67</sub> HA-Ox <sub>3.00</sub> (100 kDa) | ns   | >0.9999 |
| HA-ADH <sub>2.33</sub> HA-Ox <sub>1.00</sub> (100 kDa) vs. HA-ADH <sub>2.00</sub> HA-Ox <sub>2.00</sub> (100 kDa) | ns   | 0.5742  |
| HA-ADH <sub>1.67</sub> HA-Ox <sub>3.00</sub> (100 kDa) vs. HA-ADH <sub>2.00</sub> HA-Ox <sub>2.00</sub> (100 kDa) | ns   | 0.9285  |

**Table S3. Summary of significance for 40 kDa HA gelation times and 100 kDa HA gelation time.** A summary of significance for the gelation times for both 40 kDa and 100 kDa is listed, a one-way ANOVA post-hoc Dunnett's T3 multiple comparisons was performed. n = 3; \* p < 0.05, \*\* < p 0.01, \*\*\* p < 0.001, \*\*\*\* p < 0.0001.

*Statistical Analysis of Compressive Modulus*

| Compressive Modulus Significance                                                                                 |         |                  |
|------------------------------------------------------------------------------------------------------------------|---------|------------------|
| Dunnett's T3 multiple comparisons test                                                                           | Summary | Adjusted P Value |
| HA-ADH <sub>1.00</sub> HA-Ox <sub>1.00</sub> (40 kDa) vs. HA-ADH <sub>3.00</sub> HA-Ox <sub>1.00</sub> (40 kDa)  | ns      | 0.9591           |
| HA-ADH <sub>1.00</sub> HA-Ox <sub>1.00</sub> (40 kDa) vs. HA-ADH <sub>1.00</sub> HA-Ox <sub>3.00</sub> (40 kDa)  | ns      | >0.9999          |
| HA-ADH <sub>1.00</sub> HA-Ox <sub>1.00</sub> (40 kDa) vs. HA-ADH <sub>3.00</sub> HA-Ox <sub>3.00</sub> (40 kDa)  | ns      | 0.4543           |
| HA-ADH <sub>1.00</sub> HA-Ox <sub>1.00</sub> (40 kDa) vs. HA-ADH <sub>1.67</sub> HA-Ox <sub>1.00</sub> (40 kDa)  | ns      | 0.5122           |
| HA-ADH <sub>1.00</sub> HA-Ox <sub>1.00</sub> (40 kDa) vs. HA-ADH <sub>2.00</sub> HA-Ox <sub>2.00</sub> (40 kDa)  | ns      | 0.8766           |
| HA-ADH <sub>1.00</sub> HA-Ox <sub>1.00</sub> (40 kDa) vs. HA-ADH <sub>1.00</sub> HA-Ox <sub>1.00</sub> (100 kDa) | *       | 0.0297           |
| HA-ADH <sub>1.00</sub> HA-Ox <sub>1.00</sub> (40 kDa) vs. HA-ADH <sub>3.00</sub> HA-Ox <sub>1.00</sub> (100 kDa) | ns      | 0.3815           |
| HA-ADH <sub>1.00</sub> HA-Ox <sub>1.00</sub> (40 kDa) vs. HA-ADH <sub>1.00</sub> HA-Ox <sub>3.00</sub> (100 kDa) | ns      | 0.5412           |
| HA-ADH <sub>1.00</sub> HA-Ox <sub>1.00</sub> (40 kDa) vs. HA-ADH <sub>3.00</sub> HA-Ox <sub>3.00</sub> (100 kDa) | ns      | 0.1398           |
| HA-ADH <sub>1.00</sub> HA-Ox <sub>1.00</sub> (40 kDa) vs. HA-ADH <sub>1.00</sub> HA-Ox <sub>1.67</sub> (100 kDa) | ns      | 0.2201           |
| HA-ADH <sub>1.00</sub> HA-Ox <sub>1.00</sub> (40 kDa) vs. HA-ADH <sub>3.00</sub> HA-Ox <sub>2.33</sub> (100 kDa) | **      | 0.0065           |
| HA-ADH <sub>1.00</sub> HA-Ox <sub>1.00</sub> (40 kDa) vs. HA-ADH <sub>2.33</sub> HA-Ox <sub>1.00</sub> (100 kDa) | *       | 0.0296           |
| HA-ADH <sub>1.00</sub> HA-Ox <sub>1.00</sub> (40 kDa) vs. HA-ADH <sub>1.67</sub> HA-Ox <sub>3.00</sub> (100 kDa) | ns      | 0.1101           |
| HA-ADH <sub>1.00</sub> HA-Ox <sub>1.00</sub> (40 kDa) vs. HA-ADH <sub>2.00</sub> HA-Ox <sub>2.00</sub> (100 kDa) | ***     | 0.0001           |
| HA-ADH <sub>3.00</sub> HA-Ox <sub>1.00</sub> (40 kDa) vs. HA-ADH <sub>1.00</sub> HA-Ox <sub>3.00</sub> (40 kDa)  | ns      | 0.9702           |
| HA-ADH <sub>3.00</sub> HA-Ox <sub>1.00</sub> (40 kDa) vs. HA-ADH <sub>3.00</sub> HA-Ox <sub>3.00</sub> (40 kDa)  | ns      | 0.5643           |
| HA-ADH <sub>3.00</sub> HA-Ox <sub>1.00</sub> (40 kDa) vs. HA-ADH <sub>1.67</sub> HA-Ox <sub>1.00</sub> (40 kDa)  | ns      | 0.9999           |
| HA-ADH <sub>3.00</sub> HA-Ox <sub>1.00</sub> (40 kDa) vs. HA-ADH <sub>2.00</sub> HA-Ox <sub>2.00</sub> (40 kDa)  | ns      | 0.9989           |
| HA-ADH <sub>3.00</sub> HA-Ox <sub>1.00</sub> (40 kDa) vs. HA-ADH <sub>1.00</sub> HA-Ox <sub>1.00</sub> (100 kDa) | ns      | 0.144            |
| HA-ADH <sub>3.00</sub> HA-Ox <sub>1.00</sub> (40 kDa) vs. HA-ADH <sub>3.00</sub> HA-Ox <sub>1.00</sub> (100 kDa) | ns      | 0.431            |
| HA-ADH <sub>3.00</sub> HA-Ox <sub>1.00</sub> (40 kDa) vs. HA-ADH <sub>1.00</sub> HA-Ox <sub>3.00</sub> (100 kDa) | ns      | 0.6178           |

|                                                                                                                  |     |         |
|------------------------------------------------------------------------------------------------------------------|-----|---------|
| HA-ADH <sub>3.00</sub> HA-Ox <sub>1.00</sub> (40 kDa) vs. HA-ADH <sub>3.00</sub> HA-Ox <sub>3.00</sub> (100 kDa) | ns  | 0.1057  |
| HA-ADH <sub>3.00</sub> HA-Ox <sub>1.00</sub> (40 kDa) vs. HA-ADH <sub>1.00</sub> HA-Ox <sub>1.67</sub> (100 kDa) | ns  | 0.2891  |
| HA-ADH <sub>3.00</sub> HA-Ox <sub>1.00</sub> (40 kDa) vs. HA-ADH <sub>3.00</sub> HA-Ox <sub>2.33</sub> (100 kDa) | **  | 0.0036  |
| HA-ADH <sub>3.00</sub> HA-Ox <sub>1.00</sub> (40 kDa) vs. HA-ADH <sub>2.33</sub> HA-Ox <sub>1.00</sub> (100 kDa) | *   | 0.0491  |
| HA-ADH <sub>3.00</sub> HA-Ox <sub>1.00</sub> (40 kDa) vs. HA-ADH <sub>1.67</sub> HA-Ox <sub>3.00</sub> (100 kDa) | ns  | 0.0833  |
| HA-ADH <sub>3.00</sub> HA-Ox <sub>1.00</sub> (40 kDa) vs. HA-ADH <sub>2.00</sub> HA-Ox <sub>2.00</sub> (100 kDa) | *** | 0.0002  |
| HA-ADH <sub>1.00</sub> HA-Ox <sub>3.00</sub> (40 kDa) vs. HA-ADH <sub>3.00</sub> HA-Ox <sub>3.00</sub> (40 kDa)  | ns  | 0.4708  |
| HA-ADH <sub>1.00</sub> HA-Ox <sub>3.00</sub> (40 kDa) vs. HA-ADH <sub>1.67</sub> HA-Ox <sub>1.00</sub> (40 kDa)  | ns  | 0.5468  |
| HA-ADH <sub>1.00</sub> HA-Ox <sub>3.00</sub> (40 kDa) vs. HA-ADH <sub>2.00</sub> HA-Ox <sub>2.00</sub> (40 kDa)  | ns  | 0.9131  |
| HA-ADH <sub>1.00</sub> HA-Ox <sub>3.00</sub> (40 kDa) vs. HA-ADH <sub>1.00</sub> HA-Ox <sub>1.00</sub> (100 kDa) | *   | 0.0434  |
| HA-ADH <sub>1.00</sub> HA-Ox <sub>3.00</sub> (40 kDa) vs. HA-ADH <sub>3.00</sub> HA-Ox <sub>1.00</sub> (100 kDa) | ns  | 0.3904  |
| HA-ADH <sub>1.00</sub> HA-Ox <sub>3.00</sub> (40 kDa) vs. HA-ADH <sub>1.00</sub> HA-Ox <sub>3.00</sub> (100 kDa) | ns  | 0.5559  |
| HA-ADH <sub>1.00</sub> HA-Ox <sub>3.00</sub> (40 kDa) vs. HA-ADH <sub>3.00</sub> HA-Ox <sub>3.00</sub> (100 kDa) | ns  | 0.1407  |
| HA-ADH <sub>1.00</sub> HA-Ox <sub>3.00</sub> (40 kDa) vs. HA-ADH <sub>1.00</sub> HA-Ox <sub>1.67</sub> (100 kDa) | ns  | 0.2246  |
| HA-ADH <sub>1.00</sub> HA-Ox <sub>3.00</sub> (40 kDa) vs. HA-ADH <sub>3.00</sub> HA-Ox <sub>2.33</sub> (100 kDa) | *   | 0.0243  |
| HA-ADH <sub>1.00</sub> HA-Ox <sub>3.00</sub> (40 kDa) vs. HA-ADH <sub>2.33</sub> HA-Ox <sub>1.00</sub> (100 kDa) | ns  | 0.0734  |
| HA-ADH <sub>1.00</sub> HA-Ox <sub>3.00</sub> (40 kDa) vs. HA-ADH <sub>1.67</sub> HA-Ox <sub>3.00</sub> (100 kDa) | ns  | 0.1083  |
| HA-ADH <sub>1.00</sub> HA-Ox <sub>3.00</sub> (40 kDa) vs. HA-ADH <sub>2.00</sub> HA-Ox <sub>2.00</sub> (100 kDa) | *** | 0.0003  |
| HA-ADH <sub>3.00</sub> HA-Ox <sub>3.00</sub> (40 kDa) vs. HA-ADH <sub>1.67</sub> HA-Ox <sub>1.00</sub> (40 kDa)  | ns  | 0.638   |
| HA-ADH <sub>3.00</sub> HA-Ox <sub>3.00</sub> (40 kDa) vs. HA-ADH <sub>2.00</sub> HA-Ox <sub>2.00</sub> (40 kDa)  | ns  | 0.8503  |
| HA-ADH <sub>3.00</sub> HA-Ox <sub>3.00</sub> (40 kDa) vs. HA-ADH <sub>1.00</sub> HA-Ox <sub>1.00</sub> (100 kDa) | ns  | 0.9537  |
| HA-ADH <sub>3.00</sub> HA-Ox <sub>3.00</sub> (40 kDa) vs. HA-ADH <sub>3.00</sub> HA-Ox <sub>1.00</sub> (100 kDa) | ns  | 0.9545  |
| HA-ADH <sub>3.00</sub> HA-Ox <sub>3.00</sub> (40 kDa) vs. HA-ADH <sub>1.00</sub> HA-Ox <sub>3.00</sub> (100 kDa) | ns  | >0.9999 |
| HA-ADH <sub>3.00</sub> HA-Ox <sub>3.00</sub> (40 kDa) vs. HA-ADH <sub>3.00</sub> HA-Ox <sub>3.00</sub> (100 kDa) | ns  | 0.9992  |
| HA-ADH <sub>3.00</sub> HA-Ox <sub>3.00</sub> (40 kDa) vs. HA-ADH <sub>1.00</sub> HA-Ox <sub>1.67</sub> (100 kDa) | ns  | >0.9999 |
| HA-ADH <sub>3.00</sub> HA-Ox <sub>3.00</sub> (40 kDa) vs. HA-ADH <sub>3.00</sub> HA-Ox <sub>2.33</sub> (100 kDa) | ns  | 0.7687  |
| HA-ADH <sub>3.00</sub> HA-Ox <sub>3.00</sub> (40 kDa) vs. HA-ADH <sub>2.33</sub> HA-Ox <sub>1.00</sub> (100 kDa) | ns  | 0.9996  |
| HA-ADH <sub>3.00</sub> HA-Ox <sub>3.00</sub> (40 kDa) vs. HA-ADH <sub>1.67</sub> HA-Ox <sub>3.00</sub> (100 kDa) | ns  | >0.9999 |
| HA-ADH <sub>3.00</sub> HA-Ox <sub>3.00</sub> (40 kDa) vs. HA-ADH <sub>2.00</sub> HA-Ox <sub>2.00</sub> (100 kDa) | ns  | 0.2458  |
| HA-ADH <sub>1.67</sub> HA-Ox <sub>1.00</sub> (40 kDa) vs. HA-ADH <sub>2.00</sub> HA-Ox <sub>2.00</sub> (40 kDa)  | ns  | >0.9999 |
| HA-ADH <sub>1.67</sub> HA-Ox <sub>1.00</sub> (40 kDa) vs. HA-ADH <sub>1.00</sub> HA-Ox <sub>1.00</sub> (100 kDa) | ns  | 0.2323  |
| HA-ADH <sub>1.67</sub> HA-Ox <sub>1.00</sub> (40 kDa) vs. HA-ADH <sub>3.00</sub> HA-Ox <sub>1.00</sub> (100 kDa) | ns  | 0.4638  |
| HA-ADH <sub>1.67</sub> HA-Ox <sub>1.00</sub> (40 kDa) vs. HA-ADH <sub>1.00</sub> HA-Ox <sub>3.00</sub> (100 kDa) | ns  | 0.6686  |
| HA-ADH <sub>1.67</sub> HA-Ox <sub>1.00</sub> (40 kDa) vs. HA-ADH <sub>3.00</sub> HA-Ox <sub>3.00</sub> (100 kDa) | ns  | 0.203   |
| HA-ADH <sub>1.67</sub> HA-Ox <sub>1.00</sub> (40 kDa) vs. HA-ADH <sub>1.00</sub> HA-Ox <sub>1.67</sub> (100 kDa) | ns  | 0.3314  |
| HA-ADH <sub>1.67</sub> HA-Ox <sub>1.00</sub> (40 kDa) vs. HA-ADH <sub>3.00</sub> HA-Ox <sub>2.33</sub> (100 kDa) | **  | 0.0039  |
| HA-ADH <sub>1.67</sub> HA-Ox <sub>1.00</sub> (40 kDa) vs. HA-ADH <sub>2.33</sub> HA-Ox <sub>1.00</sub> (100 kDa) | ns  | 0.057   |
| HA-ADH <sub>1.67</sub> HA-Ox <sub>1.00</sub> (40 kDa) vs. HA-ADH <sub>1.67</sub> HA-Ox <sub>3.00</sub> (100 kDa) | ns  | 0.0997  |
| HA-ADH <sub>1.67</sub> HA-Ox <sub>1.00</sub> (40 kDa) vs. HA-ADH <sub>2.00</sub> HA-Ox <sub>2.00</sub> (100 kDa) | *** | 0.0003  |
| HA-ADH <sub>2.00</sub> HA-Ox <sub>2.00</sub> (40 kDa) vs. HA-ADH <sub>1.00</sub> HA-Ox <sub>1.00</sub> (100 kDa) | ns  | 0.9845  |
| HA-ADH <sub>2.00</sub> HA-Ox <sub>2.00</sub> (40 kDa) vs. HA-ADH <sub>3.00</sub> HA-Ox <sub>1.00</sub> (100 kDa) | ns  | 0.5079  |

|                                                                                                                   |     |         |
|-------------------------------------------------------------------------------------------------------------------|-----|---------|
| HA-ADH <sub>2.00</sub> HA-Ox <sub>2.00</sub> (40 kDa) vs. HA-ADH <sub>1.00</sub> HA-Ox <sub>3.00</sub> (100 kDa)  | ns  | 0.7857  |
| HA-ADH <sub>2.00</sub> HA-Ox <sub>2.00</sub> (40 kDa) vs. HA-ADH <sub>3.00</sub> HA-Ox <sub>3.00</sub> (100 kDa)  | ns  | 0.2589  |
| HA-ADH <sub>2.00</sub> HA-Ox <sub>2.00</sub> (40 kDa) vs. HA-ADH <sub>1.00</sub> HA-Ox <sub>1.67</sub> (100 kDa)  | ns  | 0.5083  |
| HA-ADH <sub>2.00</sub> HA-Ox <sub>2.00</sub> (40 kDa) vs. HA-ADH <sub>3.00</sub> HA-Ox <sub>2.33</sub> (100 kDa)  | ns  | 0.0877  |
| HA-ADH <sub>2.00</sub> HA-Ox <sub>2.00</sub> (40 kDa) vs. HA-ADH <sub>2.33</sub> HA-Ox <sub>1.00</sub> (100 kDa)  | ns  | 0.1852  |
| HA-ADH <sub>2.00</sub> HA-Ox <sub>2.00</sub> (40 kDa) vs. HA-ADH <sub>1.67</sub> HA-Ox <sub>3.00</sub> (100 kDa)  | ns  | 0.2961  |
| HA-ADH <sub>2.00</sub> HA-Ox <sub>2.00</sub> (40 kDa) vs. HA-ADH <sub>2.00</sub> HA-Ox <sub>2.00</sub> (100 kDa)  | **  | 0.0047  |
| HA-ADH <sub>1.00</sub> HA-Ox <sub>1.00</sub> (100 kDa) vs. HA-ADH <sub>3.00</sub> HA-Ox <sub>1.00</sub> (100 kDa) | ns  | 0.6264  |
| HA-ADH <sub>1.00</sub> HA-Ox <sub>1.00</sub> (100 kDa) vs. HA-ADH <sub>1.00</sub> HA-Ox <sub>3.00</sub> (100 kDa) | ns  | 0.8819  |
| HA-ADH <sub>1.00</sub> HA-Ox <sub>1.00</sub> (100 kDa) vs. HA-ADH <sub>3.00</sub> HA-Ox <sub>3.00</sub> (100 kDa) | ns  | 0.3723  |
| HA-ADH <sub>1.00</sub> HA-Ox <sub>1.00</sub> (100 kDa) vs. HA-ADH <sub>1.00</sub> HA-Ox <sub>1.67</sub> (100 kDa) | ns  | 0.6428  |
| HA-ADH <sub>1.00</sub> HA-Ox <sub>1.00</sub> (100 kDa) vs. HA-ADH <sub>3.00</sub> HA-Ox <sub>2.33</sub> (100 kDa) | *   | 0.0263  |
| HA-ADH <sub>1.00</sub> HA-Ox <sub>1.00</sub> (100 kDa) vs. HA-ADH <sub>2.33</sub> HA-Ox <sub>1.00</sub> (100 kDa) | ns  | 0.1541  |
| HA-ADH <sub>1.00</sub> HA-Ox <sub>1.00</sub> (100 kDa) vs. HA-ADH <sub>1.67</sub> HA-Ox <sub>3.00</sub> (100 kDa) | ns  | 0.2902  |
| HA-ADH <sub>1.00</sub> HA-Ox <sub>1.00</sub> (100 kDa) vs. HA-ADH <sub>2.00</sub> HA-Ox <sub>2.00</sub> (100 kDa) | *** | 0.001   |
| HA-ADH <sub>3.00</sub> HA-Ox <sub>1.00</sub> (100 kDa) vs. HA-ADH <sub>1.00</sub> HA-Ox <sub>3.00</sub> (100 kDa) | ns  | >0.9999 |
| HA-ADH <sub>3.00</sub> HA-Ox <sub>1.00</sub> (100 kDa) vs. HA-ADH <sub>3.00</sub> HA-Ox <sub>3.00</sub> (100 kDa) | ns  | 0.9991  |
| HA-ADH <sub>3.00</sub> HA-Ox <sub>1.00</sub> (100 kDa) vs. HA-ADH <sub>1.00</sub> HA-Ox <sub>1.67</sub> (100 kDa) | ns  | 0.9743  |
| HA-ADH <sub>3.00</sub> HA-Ox <sub>1.00</sub> (100 kDa) vs. HA-ADH <sub>3.00</sub> HA-Ox <sub>2.33</sub> (100 kDa) | ns  | >0.9999 |
| HA-ADH <sub>3.00</sub> HA-Ox <sub>1.00</sub> (100 kDa) vs. HA-ADH <sub>2.33</sub> HA-Ox <sub>1.00</sub> (100 kDa) | ns  | 0.9915  |
| HA-ADH <sub>3.00</sub> HA-Ox <sub>1.00</sub> (100 kDa) vs. HA-ADH <sub>1.67</sub> HA-Ox <sub>3.00</sub> (100 kDa) | ns  | 0.9682  |
| HA-ADH <sub>3.00</sub> HA-Ox <sub>1.00</sub> (100 kDa) vs. HA-ADH <sub>2.00</sub> HA-Ox <sub>2.00</sub> (100 kDa) | ns  | 0.9996  |
| HA-ADH <sub>1.00</sub> HA-Ox <sub>3.00</sub> (100 kDa) vs. HA-ADH <sub>3.00</sub> HA-Ox <sub>3.00</sub> (100 kDa) | ns  | >0.9999 |
| HA-ADH <sub>1.00</sub> HA-Ox <sub>3.00</sub> (100 kDa) vs. HA-ADH <sub>1.00</sub> HA-Ox <sub>1.67</sub> (100 kDa) | ns  | >0.9999 |
| HA-ADH <sub>1.00</sub> HA-Ox <sub>3.00</sub> (100 kDa) vs. HA-ADH <sub>3.00</sub> HA-Ox <sub>2.33</sub> (100 kDa) | ns  | >0.9999 |
| HA-ADH <sub>1.00</sub> HA-Ox <sub>3.00</sub> (100 kDa) vs. HA-ADH <sub>2.33</sub> HA-Ox <sub>1.00</sub> (100 kDa) | ns  | >0.9999 |
| HA-ADH <sub>1.00</sub> HA-Ox <sub>3.00</sub> (100 kDa) vs. HA-ADH <sub>1.67</sub> HA-Ox <sub>3.00</sub> (100 kDa) | ns  | >0.9999 |
| HA-ADH <sub>1.00</sub> HA-Ox <sub>3.00</sub> (100 kDa) vs. HA-ADH <sub>2.00</sub> HA-Ox <sub>2.00</sub> (100 kDa) | ns  | 0.8547  |
| HA-ADH <sub>3.00</sub> HA-Ox <sub>3.00</sub> (100 kDa) vs. HA-ADH <sub>1.00</sub> HA-Ox <sub>1.67</sub> (100 kDa) | ns  | >0.9999 |
| HA-ADH <sub>3.00</sub> HA-Ox <sub>3.00</sub> (100 kDa) vs. HA-ADH <sub>3.00</sub> HA-Ox <sub>2.33</sub> (100 kDa) | ns  | 0.9655  |
| HA-ADH <sub>3.00</sub> HA-Ox <sub>3.00</sub> (100 kDa) vs. HA-ADH <sub>2.33</sub> HA-Ox <sub>1.00</sub> (100 kDa) | ns  | >0.9999 |
| HA-ADH <sub>3.00</sub> HA-Ox <sub>3.00</sub> (100 kDa) vs. HA-ADH <sub>1.67</sub> HA-Ox <sub>3.00</sub> (100 kDa) | ns  | >0.9999 |
| HA-ADH <sub>3.00</sub> HA-Ox <sub>3.00</sub> (100 kDa) vs. HA-ADH <sub>2.00</sub> HA-Ox <sub>2.00</sub> (100 kDa) | ns  | 0.1859  |
| HA-ADH <sub>1.00</sub> HA-Ox <sub>1.67</sub> (100 kDa) vs. HA-ADH <sub>3.00</sub> HA-Ox <sub>2.33</sub> (100 kDa) | ns  | 0.6977  |
| HA-ADH <sub>1.00</sub> HA-Ox <sub>1.67</sub> (100 kDa) vs. HA-ADH <sub>2.33</sub> HA-Ox <sub>1.00</sub> (100 kDa) | ns  | >0.9999 |
| HA-ADH <sub>1.00</sub> HA-Ox <sub>1.67</sub> (100 kDa) vs. HA-ADH <sub>1.67</sub> HA-Ox <sub>3.00</sub> (100 kDa) | ns  | >0.9999 |
| HA-ADH <sub>1.00</sub> HA-Ox <sub>1.67</sub> (100 kDa) vs. HA-ADH <sub>2.00</sub> HA-Ox <sub>2.00</sub> (100 kDa) | ns  | 0.1135  |
| HA-ADH <sub>3.00</sub> HA-Ox <sub>2.33</sub> (100 kDa) vs. HA-ADH <sub>2.33</sub> HA-Ox <sub>1.00</sub> (100 kDa) | ns  | 0.7478  |
| HA-ADH <sub>3.00</sub> HA-Ox <sub>2.33</sub> (100 kDa) vs. HA-ADH <sub>1.67</sub> HA-Ox <sub>3.00</sub> (100 kDa) | ns  | 0.5603  |
| HA-ADH <sub>3.00</sub> HA-Ox <sub>2.33</sub> (100 kDa) vs. HA-ADH <sub>2.00</sub> HA-Ox <sub>2.00</sub> (100 kDa) | ns  | 0.2718  |
| HA-ADH <sub>2.33</sub> HA-Ox <sub>1.00</sub> (100 kDa) vs. HA-ADH <sub>1.67</sub> HA-Ox <sub>3.00</sub> (100 kDa) | ns  | >0.9999 |



|                                                                                                                   |    |        |
|-------------------------------------------------------------------------------------------------------------------|----|--------|
| HA-ADH <sub>2.33</sub> HA-Ox <sub>1.00</sub> (100 kDa) vs. HA-ADH <sub>2.00</sub> HA-Ox <sub>2.00</sub> (100 kDa) | ns | 0.0538 |
| HA-ADH <sub>1.67</sub> HA-Ox <sub>3.00</sub> (100 kDa) vs. HA-ADH <sub>2.00</sub> HA-Ox <sub>2.00</sub> (100 kDa) | *  | 0.044  |

**Table S4. Summary of significance for 40 kDa HA compressive modulus and 100 kDa HA compressive modulus.** A summary of significance for the compressive modulus for both 40 kDa and 100 kDa is listed, a one-way ANOVA post-hoc Dunnett's T3 multiple comparisons was performed. n = 3; \* p < 0.05, \*\* < p 0.01, \*\*\* p < 0.001, \*\*\*\* p < 0.0001.

*Statistical Analysis of Mass Change*

| Mass Change Significance                                                                                         |         |                  |
|------------------------------------------------------------------------------------------------------------------|---------|------------------|
| Tukey's multiple comparisons test                                                                                | Summary | Adjusted P Value |
| <b>Day 1</b>                                                                                                     |         |                  |
| HA-ADH <sub>3.00</sub> HA-Ox <sub>3.00</sub> (40 kDa) vs. HA-ADH <sub>3.00</sub> HA-Ox <sub>1.00</sub> (40 kDa)  | ns      | 0.484            |
| HA-ADH <sub>3.00</sub> HA-Ox <sub>3.00</sub> (40 kDa) vs. HA-ADH <sub>2.00</sub> HA-Ox <sub>2.00</sub> (40 kDa)  | ns      | 0.5557           |
| HA-ADH <sub>3.00</sub> HA-Ox <sub>3.00</sub> (40 kDa) vs. HA-ADH <sub>1.67</sub> HA-Ox <sub>1.00</sub> (40 kDa)  | ns      | 0.6338           |
| HA-ADH <sub>3.00</sub> HA-Ox <sub>3.00</sub> (40 kDa) vs. HA-ADH <sub>1.00</sub> HA-Ox <sub>3.00</sub> (40 kDa)  | ns      | 0.9969           |
| HA-ADH <sub>3.00</sub> HA-Ox <sub>3.00</sub> (40 kDa) vs. HA-ADH <sub>1.00</sub> HA-Ox <sub>1.00</sub> (40 kDa)  | ns      | 0.3629           |
| HA-ADH <sub>3.00</sub> HA-Ox <sub>3.00</sub> (40 kDa) vs. HA-ADH <sub>3.00</sub> HA-Ox <sub>3.00</sub> (100 kDa) | ns      | 0.1086           |
| HA-ADH <sub>3.00</sub> HA-Ox <sub>3.00</sub> (40 kDa) vs. HA-ADH <sub>3.00</sub> HA-Ox <sub>2.33</sub> (100 kDa) | ns      | 0.7109           |
| HA-ADH <sub>3.00</sub> HA-Ox <sub>3.00</sub> (40 kDa) vs. HA-ADH <sub>3.00</sub> HA-Ox <sub>1.00</sub> (100 kDa) | ns      | >0.9999          |
| HA-ADH <sub>3.00</sub> HA-Ox <sub>3.00</sub> (40 kDa) vs. HA-ADH <sub>2.33</sub> HA-Ox <sub>1.00</sub> (100 kDa) | ns      | 0.9294           |
| HA-ADH <sub>3.00</sub> HA-Ox <sub>3.00</sub> (40 kDa) vs. HA-ADH <sub>2.00</sub> HA-Ox <sub>2.00</sub> (100 kDa) | ns      | 0.7845           |
| HA-ADH <sub>3.00</sub> HA-Ox <sub>3.00</sub> (40 kDa) vs. HA-ADH <sub>1.67</sub> HA-Ox <sub>3.00</sub> (100 kDa) | ns      | >0.9999          |
| HA-ADH <sub>3.00</sub> HA-Ox <sub>3.00</sub> (40 kDa) vs. HA-ADH <sub>1.00</sub> HA-Ox <sub>3.00</sub> (100 kDa) | ns      | 0.683            |
| HA-ADH <sub>3.00</sub> HA-Ox <sub>3.00</sub> (40 kDa) vs. HA-ADH <sub>1.00</sub> HA-Ox <sub>1.67</sub> (100 kDa) | ns      | >0.9999          |
| HA-ADH <sub>3.00</sub> HA-Ox <sub>3.00</sub> (40 kDa) vs. HA-ADH <sub>1.00</sub> HA-Ox <sub>1.00</sub> (100 kDa) | ns      | 0.3514           |
| HA-ADH <sub>3.00</sub> HA-Ox <sub>1.00</sub> (40 kDa) vs. HA-ADH <sub>2.00</sub> HA-Ox <sub>2.00</sub> (40 kDa)  | ns      | 0.7532           |
| HA-ADH <sub>3.00</sub> HA-Ox <sub>1.00</sub> (40 kDa) vs. HA-ADH <sub>1.67</sub> HA-Ox <sub>1.00</sub> (40 kDa)  | ns      | 0.7932           |
| HA-ADH <sub>3.00</sub> HA-Ox <sub>1.00</sub> (40 kDa) vs. HA-ADH <sub>1.00</sub> HA-Ox <sub>3.00</sub> (40 kDa)  | ns      | >0.9999          |
| HA-ADH <sub>3.00</sub> HA-Ox <sub>1.00</sub> (40 kDa) vs. HA-ADH <sub>1.00</sub> HA-Ox <sub>1.00</sub> (40 kDa)  | ns      | >0.9999          |
| HA-ADH <sub>3.00</sub> HA-Ox <sub>1.00</sub> (40 kDa) vs. HA-ADH <sub>3.00</sub> HA-Ox <sub>3.00</sub> (100 kDa) | ns      | 0.1164           |
| HA-ADH <sub>3.00</sub> HA-Ox <sub>1.00</sub> (40 kDa) vs. HA-ADH <sub>3.00</sub> HA-Ox <sub>2.33</sub> (100 kDa) | ns      | 0.2618           |
| HA-ADH <sub>3.00</sub> HA-Ox <sub>1.00</sub> (40 kDa) vs. HA-ADH <sub>3.00</sub> HA-Ox <sub>1.00</sub> (100 kDa) | ns      | 0.5469           |
| HA-ADH <sub>3.00</sub> HA-Ox <sub>1.00</sub> (40 kDa) vs. HA-ADH <sub>2.33</sub> HA-Ox <sub>1.00</sub> (100 kDa) | ns      | 0.3309           |
| HA-ADH <sub>3.00</sub> HA-Ox <sub>1.00</sub> (40 kDa) vs. HA-ADH <sub>2.00</sub> HA-Ox <sub>2.00</sub> (100 kDa) | ns      | 0.2637           |
| HA-ADH <sub>3.00</sub> HA-Ox <sub>1.00</sub> (40 kDa) vs. HA-ADH <sub>1.67</sub> HA-Ox <sub>3.00</sub> (100 kDa) | ns      | 0.855            |
| HA-ADH <sub>3.00</sub> HA-Ox <sub>1.00</sub> (40 kDa) vs. HA-ADH <sub>1.00</sub> HA-Ox <sub>3.00</sub> (100 kDa) | ns      | >0.9999          |
| HA-ADH <sub>3.00</sub> HA-Ox <sub>1.00</sub> (40 kDa) vs. HA-ADH <sub>1.00</sub> HA-Ox <sub>1.67</sub> (100 kDa) | ns      | 0.8929           |
| HA-ADH <sub>3.00</sub> HA-Ox <sub>1.00</sub> (40 kDa) vs. HA-ADH <sub>1.00</sub> HA-Ox <sub>1.00</sub> (100 kDa) | ns      | 0.2722           |
| HA-ADH <sub>2.00</sub> HA-Ox <sub>2.00</sub> (40 kDa) vs. HA-ADH <sub>1.67</sub> HA-Ox <sub>1.00</sub> (40 kDa)  | ns      | >0.9999          |
| HA-ADH <sub>2.00</sub> HA-Ox <sub>2.00</sub> (40 kDa) vs. HA-ADH <sub>1.00</sub> HA-Ox <sub>3.00</sub> (40 kDa)  | ns      | 0.9999           |

|                                                                                                                  |    |         |
|------------------------------------------------------------------------------------------------------------------|----|---------|
| HA-ADH <sub>2.00</sub> HA-Ox <sub>2.00</sub> (40 kDa) vs. HA-ADH <sub>1.00</sub> HA-Ox <sub>1.00</sub> (40 kDa)  | ns | 0.7066  |
| HA-ADH <sub>2.00</sub> HA-Ox <sub>2.00</sub> (40 kDa) vs. HA-ADH <sub>3.00</sub> HA-Ox <sub>3.00</sub> (100 kDa) | ns | 0.0524  |
| HA-ADH <sub>2.00</sub> HA-Ox <sub>2.00</sub> (40 kDa) vs. HA-ADH <sub>3.00</sub> HA-Ox <sub>2.33</sub> (100 kDa) | ns | 0.302   |
| HA-ADH <sub>2.00</sub> HA-Ox <sub>2.00</sub> (40 kDa) vs. HA-ADH <sub>3.00</sub> HA-Ox <sub>1.00</sub> (100 kDa) | ns | 0.9163  |
| HA-ADH <sub>2.00</sub> HA-Ox <sub>2.00</sub> (40 kDa) vs. HA-ADH <sub>2.33</sub> HA-Ox <sub>1.00</sub> (100 kDa) | ns | 0.424   |
| HA-ADH <sub>2.00</sub> HA-Ox <sub>2.00</sub> (40 kDa) vs. HA-ADH <sub>2.00</sub> HA-Ox <sub>2.00</sub> (100 kDa) | ns | 0.489   |
| HA-ADH <sub>2.00</sub> HA-Ox <sub>2.00</sub> (40 kDa) vs. HA-ADH <sub>1.67</sub> HA-Ox <sub>3.00</sub> (100 kDa) | ns | >0.9999 |
| HA-ADH <sub>2.00</sub> HA-Ox <sub>2.00</sub> (40 kDa) vs. HA-ADH <sub>1.00</sub> HA-Ox <sub>3.00</sub> (100 kDa) | ns | 0.9259  |
| HA-ADH <sub>2.00</sub> HA-Ox <sub>2.00</sub> (40 kDa) vs. HA-ADH <sub>1.00</sub> HA-Ox <sub>1.67</sub> (100 kDa) | ns | >0.9999 |
| HA-ADH <sub>2.00</sub> HA-Ox <sub>2.00</sub> (40 kDa) vs. HA-ADH <sub>1.00</sub> HA-Ox <sub>1.00</sub> (100 kDa) | ns | 0.068   |
| HA-ADH <sub>1.67</sub> HA-Ox <sub>1.00</sub> (40 kDa) vs. HA-ADH <sub>1.00</sub> HA-Ox <sub>3.00</sub> (40 kDa)  | ns | >0.9999 |
| HA-ADH <sub>1.67</sub> HA-Ox <sub>1.00</sub> (40 kDa) vs. HA-ADH <sub>1.00</sub> HA-Ox <sub>1.00</sub> (40 kDa)  | ns | 0.773   |
| HA-ADH <sub>1.67</sub> HA-Ox <sub>1.00</sub> (40 kDa) vs. HA-ADH <sub>3.00</sub> HA-Ox <sub>3.00</sub> (100 kDa) | *  | 0.0444  |
| HA-ADH <sub>1.67</sub> HA-Ox <sub>1.00</sub> (40 kDa) vs. HA-ADH <sub>3.00</sub> HA-Ox <sub>2.33</sub> (100 kDa) | ns | 0.2954  |
| HA-ADH <sub>1.67</sub> HA-Ox <sub>1.00</sub> (40 kDa) vs. HA-ADH <sub>3.00</sub> HA-Ox <sub>1.00</sub> (100 kDa) | ns | 0.9206  |
| HA-ADH <sub>1.67</sub> HA-Ox <sub>1.00</sub> (40 kDa) vs. HA-ADH <sub>2.33</sub> HA-Ox <sub>1.00</sub> (100 kDa) | ns | 0.4266  |
| HA-ADH <sub>1.67</sub> HA-Ox <sub>1.00</sub> (40 kDa) vs. HA-ADH <sub>2.00</sub> HA-Ox <sub>2.00</sub> (100 kDa) | ns | 0.4784  |
| HA-ADH <sub>1.67</sub> HA-Ox <sub>1.00</sub> (40 kDa) vs. HA-ADH <sub>1.67</sub> HA-Ox <sub>3.00</sub> (100 kDa) | ns | >0.9999 |
| HA-ADH <sub>1.67</sub> HA-Ox <sub>1.00</sub> (40 kDa) vs. HA-ADH <sub>1.00</sub> HA-Ox <sub>3.00</sub> (100 kDa) | ns | 0.9473  |
| HA-ADH <sub>1.67</sub> HA-Ox <sub>1.00</sub> (40 kDa) vs. HA-ADH <sub>1.00</sub> HA-Ox <sub>1.67</sub> (100 kDa) | ns | >0.9999 |
| HA-ADH <sub>1.67</sub> HA-Ox <sub>1.00</sub> (40 kDa) vs. HA-ADH <sub>1.00</sub> HA-Ox <sub>1.00</sub> (100 kDa) | ns | 0.1043  |
| HA-ADH <sub>1.00</sub> HA-Ox <sub>3.00</sub> (40 kDa) vs. HA-ADH <sub>1.00</sub> HA-Ox <sub>1.00</sub> (40 kDa)  | ns | >0.9999 |
| HA-ADH <sub>1.00</sub> HA-Ox <sub>3.00</sub> (40 kDa) vs. HA-ADH <sub>3.00</sub> HA-Ox <sub>3.00</sub> (100 kDa) | ns | 0.8693  |
| HA-ADH <sub>1.00</sub> HA-Ox <sub>3.00</sub> (40 kDa) vs. HA-ADH <sub>3.00</sub> HA-Ox <sub>2.33</sub> (100 kDa) | ns | 0.9709  |
| HA-ADH <sub>1.00</sub> HA-Ox <sub>3.00</sub> (40 kDa) vs. HA-ADH <sub>3.00</sub> HA-Ox <sub>1.00</sub> (100 kDa) | ns | 0.998   |
| HA-ADH <sub>1.00</sub> HA-Ox <sub>3.00</sub> (40 kDa) vs. HA-ADH <sub>2.33</sub> HA-Ox <sub>1.00</sub> (100 kDa) | ns | 0.9846  |
| HA-ADH <sub>1.00</sub> HA-Ox <sub>3.00</sub> (40 kDa) vs. HA-ADH <sub>2.00</sub> HA-Ox <sub>2.00</sub> (100 kDa) | ns | 0.9557  |
| HA-ADH <sub>1.00</sub> HA-Ox <sub>3.00</sub> (40 kDa) vs. HA-ADH <sub>1.67</sub> HA-Ox <sub>3.00</sub> (100 kDa) | ns | 0.9997  |
| HA-ADH <sub>1.00</sub> HA-Ox <sub>3.00</sub> (40 kDa) vs. HA-ADH <sub>1.00</sub> HA-Ox <sub>3.00</sub> (100 kDa) | ns | >0.9999 |
| HA-ADH <sub>1.00</sub> HA-Ox <sub>3.00</sub> (40 kDa) vs. HA-ADH <sub>1.00</sub> HA-Ox <sub>1.67</sub> (100 kDa) | ns | 0.9997  |
| HA-ADH <sub>1.00</sub> HA-Ox <sub>3.00</sub> (40 kDa) vs. HA-ADH <sub>1.00</sub> HA-Ox <sub>1.00</sub> (100 kDa) | ns | 0.9713  |
| HA-ADH <sub>1.00</sub> HA-Ox <sub>1.00</sub> (40 kDa) vs. HA-ADH <sub>3.00</sub> HA-Ox <sub>3.00</sub> (100 kDa) | *  | 0.0491  |
| HA-ADH <sub>1.00</sub> HA-Ox <sub>1.00</sub> (40 kDa) vs. HA-ADH <sub>3.00</sub> HA-Ox <sub>2.33</sub> (100 kDa) | ns | 0.1617  |
| HA-ADH <sub>1.00</sub> HA-Ox <sub>1.00</sub> (40 kDa) vs. HA-ADH <sub>3.00</sub> HA-Ox <sub>1.00</sub> (100 kDa) | ns | 0.4526  |
| HA-ADH <sub>1.00</sub> HA-Ox <sub>1.00</sub> (40 kDa) vs. HA-ADH <sub>2.33</sub> HA-Ox <sub>1.00</sub> (100 kDa) | ns | 0.2208  |
| HA-ADH <sub>1.00</sub> HA-Ox <sub>1.00</sub> (40 kDa) vs. HA-ADH <sub>2.00</sub> HA-Ox <sub>2.00</sub> (100 kDa) | ns | 0.2375  |
| HA-ADH <sub>1.00</sub> HA-Ox <sub>1.00</sub> (40 kDa) vs. HA-ADH <sub>1.67</sub> HA-Ox <sub>3.00</sub> (100 kDa) | ns | 0.8852  |
| HA-ADH <sub>1.00</sub> HA-Ox <sub>1.00</sub> (40 kDa) vs. HA-ADH <sub>1.00</sub> HA-Ox <sub>3.00</sub> (100 kDa) | ns | >0.9999 |
| HA-ADH <sub>1.00</sub> HA-Ox <sub>1.00</sub> (40 kDa) vs. HA-ADH <sub>1.00</sub> HA-Ox <sub>1.67</sub> (100 kDa) | ns | 0.9225  |

|                                                                                                                   |    |         |
|-------------------------------------------------------------------------------------------------------------------|----|---------|
| HA-ADH <sub>1.00</sub> HA-Ox <sub>1.00</sub> (40 kDa) vs. HA-ADH <sub>1.00</sub> HA-Ox <sub>1.00</sub> (100 kDa)  | ns | 0.1607  |
| HA-ADH <sub>3.00</sub> HA-Ox <sub>3.00</sub> (100 kDa) vs. HA-ADH <sub>3.00</sub> HA-Ox <sub>2.33</sub> (100 kDa) | ns | 0.6167  |
| HA-ADH <sub>3.00</sub> HA-Ox <sub>3.00</sub> (100 kDa) vs. HA-ADH <sub>3.00</sub> HA-Ox <sub>1.00</sub> (100 kDa) | ns | 0.1228  |
| HA-ADH <sub>3.00</sub> HA-Ox <sub>3.00</sub> (100 kDa) vs. HA-ADH <sub>2.33</sub> HA-Ox <sub>1.00</sub> (100 kDa) | ns | 0.3806  |
| HA-ADH <sub>3.00</sub> HA-Ox <sub>3.00</sub> (100 kDa) vs. HA-ADH <sub>2.00</sub> HA-Ox <sub>2.00</sub> (100 kDa) | ns | 0.9736  |
| HA-ADH <sub>3.00</sub> HA-Ox <sub>3.00</sub> (100 kDa) vs. HA-ADH <sub>1.67</sub> HA-Ox <sub>3.00</sub> (100 kDa) | ns | 0.3941  |
| HA-ADH <sub>3.00</sub> HA-Ox <sub>3.00</sub> (100 kDa) vs. HA-ADH <sub>1.00</sub> HA-Ox <sub>3.00</sub> (100 kDa) | ns | 0.1959  |
| HA-ADH <sub>3.00</sub> HA-Ox <sub>3.00</sub> (100 kDa) vs. HA-ADH <sub>1.00</sub> HA-Ox <sub>1.67</sub> (100 kDa) | ns | 0.457   |
| HA-ADH <sub>3.00</sub> HA-Ox <sub>3.00</sub> (100 kDa) vs. HA-ADH <sub>1.00</sub> HA-Ox <sub>1.00</sub> (100 kDa) | ns | 0.3744  |
| HA-ADH <sub>3.00</sub> HA-Ox <sub>2.33</sub> (100 kDa) vs. HA-ADH <sub>3.00</sub> HA-Ox <sub>1.00</sub> (100 kDa) | ns | 0.7645  |
| HA-ADH <sub>3.00</sub> HA-Ox <sub>2.33</sub> (100 kDa) vs. HA-ADH <sub>2.33</sub> HA-Ox <sub>1.00</sub> (100 kDa) | ns | >0.9999 |
| HA-ADH <sub>3.00</sub> HA-Ox <sub>2.33</sub> (100 kDa) vs. HA-ADH <sub>2.00</sub> HA-Ox <sub>2.00</sub> (100 kDa) | ns | >0.9999 |
| HA-ADH <sub>3.00</sub> HA-Ox <sub>2.33</sub> (100 kDa) vs. HA-ADH <sub>1.67</sub> HA-Ox <sub>3.00</sub> (100 kDa) | ns | 0.8888  |
| HA-ADH <sub>3.00</sub> HA-Ox <sub>2.33</sub> (100 kDa) vs. HA-ADH <sub>1.00</sub> HA-Ox <sub>3.00</sub> (100 kDa) | ns | 0.4145  |
| HA-ADH <sub>3.00</sub> HA-Ox <sub>2.33</sub> (100 kDa) vs. HA-ADH <sub>1.00</sub> HA-Ox <sub>1.67</sub> (100 kDa) | ns | 0.9128  |
| HA-ADH <sub>3.00</sub> HA-Ox <sub>2.33</sub> (100 kDa) vs. HA-ADH <sub>1.00</sub> HA-Ox <sub>1.00</sub> (100 kDa) | ns | >0.9999 |
| HA-ADH <sub>3.00</sub> HA-Ox <sub>1.00</sub> (100 kDa) vs. HA-ADH <sub>2.33</sub> HA-Ox <sub>1.00</sub> (100 kDa) | ns | 0.9491  |
| HA-ADH <sub>3.00</sub> HA-Ox <sub>1.00</sub> (100 kDa) vs. HA-ADH <sub>2.00</sub> HA-Ox <sub>2.00</sub> (100 kDa) | ns | 0.7916  |
| HA-ADH <sub>3.00</sub> HA-Ox <sub>1.00</sub> (100 kDa) vs. HA-ADH <sub>1.67</sub> HA-Ox <sub>3.00</sub> (100 kDa) | ns | >0.9999 |
| HA-ADH <sub>3.00</sub> HA-Ox <sub>1.00</sub> (100 kDa) vs. HA-ADH <sub>1.00</sub> HA-Ox <sub>3.00</sub> (100 kDa) | ns | 0.7551  |
| HA-ADH <sub>3.00</sub> HA-Ox <sub>1.00</sub> (100 kDa) vs. HA-ADH <sub>1.00</sub> HA-Ox <sub>1.67</sub> (100 kDa) | ns | >0.9999 |
| HA-ADH <sub>3.00</sub> HA-Ox <sub>1.00</sub> (100 kDa) vs. HA-ADH <sub>1.00</sub> HA-Ox <sub>1.00</sub> (100 kDa) | ns | 0.5763  |
| HA-ADH <sub>2.33</sub> HA-Ox <sub>1.00</sub> (100 kDa) vs. HA-ADH <sub>2.00</sub> HA-Ox <sub>2.00</sub> (100 kDa) | ns | 0.9963  |
| HA-ADH <sub>2.33</sub> HA-Ox <sub>1.00</sub> (100 kDa) vs. HA-ADH <sub>1.67</sub> HA-Ox <sub>3.00</sub> (100 kDa) | ns | 0.9713  |
| HA-ADH <sub>2.33</sub> HA-Ox <sub>1.00</sub> (100 kDa) vs. HA-ADH <sub>1.00</sub> HA-Ox <sub>3.00</sub> (100 kDa) | ns | 0.5067  |
| HA-ADH <sub>2.33</sub> HA-Ox <sub>1.00</sub> (100 kDa) vs. HA-ADH <sub>1.00</sub> HA-Ox <sub>1.67</sub> (100 kDa) | ns | 0.9785  |
| HA-ADH <sub>2.33</sub> HA-Ox <sub>1.00</sub> (100 kDa) vs. HA-ADH <sub>1.00</sub> HA-Ox <sub>1.00</sub> (100 kDa) | ns | 0.9998  |
| HA-ADH <sub>2.00</sub> HA-Ox <sub>2.00</sub> (100 kDa) vs. HA-ADH <sub>1.67</sub> HA-Ox <sub>3.00</sub> (100 kDa) | ns | 0.8588  |
| HA-ADH <sub>2.00</sub> HA-Ox <sub>2.00</sub> (100 kDa) vs. HA-ADH <sub>1.00</sub> HA-Ox <sub>3.00</sub> (100 kDa) | ns | 0.3959  |
| HA-ADH <sub>2.00</sub> HA-Ox <sub>2.00</sub> (100 kDa) vs. HA-ADH <sub>1.00</sub> HA-Ox <sub>1.67</sub> (100 kDa) | ns | 0.8818  |
| HA-ADH <sub>2.00</sub> HA-Ox <sub>2.00</sub> (100 kDa) vs. HA-ADH <sub>1.00</sub> HA-Ox <sub>1.00</sub> (100 kDa) | ns | 0.9999  |
| HA-ADH <sub>1.67</sub> HA-Ox <sub>3.00</sub> (100 kDa) vs. HA-ADH <sub>1.00</sub> HA-Ox <sub>3.00</sub> (100 kDa) | ns | 0.9574  |
| HA-ADH <sub>1.67</sub> HA-Ox <sub>3.00</sub> (100 kDa) vs. HA-ADH <sub>1.00</sub> HA-Ox <sub>1.67</sub> (100 kDa) | ns | >0.9999 |
| HA-ADH <sub>1.67</sub> HA-Ox <sub>3.00</sub> (100 kDa) vs. HA-ADH <sub>1.00</sub> HA-Ox <sub>1.00</sub> (100 kDa) | ns | 0.8511  |
| HA-ADH <sub>1.00</sub> HA-Ox <sub>3.00</sub> (100 kDa) vs. HA-ADH <sub>1.00</sub> HA-Ox <sub>1.67</sub> (100 kDa) | ns | 0.9718  |
| HA-ADH <sub>1.00</sub> HA-Ox <sub>3.00</sub> (100 kDa) vs. HA-ADH <sub>1.00</sub> HA-Ox <sub>1.00</sub> (100 kDa) | ns | 0.4109  |
| HA-ADH <sub>1.00</sub> HA-Ox <sub>1.67</sub> (100 kDa) vs. HA-ADH <sub>1.00</sub> HA-Ox <sub>1.00</sub> (100 kDa) | ns | 0.886   |
| <b>Day 7</b>                                                                                                      |    |         |
| HA-ADH <sub>3.00</sub> HA-Ox <sub>3.00</sub> (40 kDa) vs. HA-ADH <sub>3.00</sub> HA-Ox <sub>1.00</sub> (40 kDa)   | ns | >0.9999 |

|                                                                                                                  |    |         |
|------------------------------------------------------------------------------------------------------------------|----|---------|
| HA-ADH <sub>3.00</sub> HA-Ox <sub>3.00</sub> (40 kDa) vs. HA-ADH <sub>2.00</sub> HA-Ox <sub>2.00</sub> (40 kDa)  | ns | >0.9999 |
| HA-ADH <sub>3.00</sub> HA-Ox <sub>3.00</sub> (40 kDa) vs. HA-ADH <sub>1.67</sub> HA-Ox <sub>1.00</sub> (40 kDa)  | ns | >0.9999 |
| HA-ADH <sub>3.00</sub> HA-Ox <sub>3.00</sub> (40 kDa) vs. HA-ADH <sub>1.00</sub> HA-Ox <sub>3.00</sub> (40 kDa)  | ns | 0.988   |
| HA-ADH <sub>3.00</sub> HA-Ox <sub>3.00</sub> (40 kDa) vs. HA-ADH <sub>1.00</sub> HA-Ox <sub>1.00</sub> (40 kDa)  | ns | 0.1866  |
| HA-ADH <sub>3.00</sub> HA-Ox <sub>3.00</sub> (40 kDa) vs. HA-ADH <sub>3.00</sub> HA-Ox <sub>3.00</sub> (100 kDa) | ns | 0.6369  |
| HA-ADH <sub>3.00</sub> HA-Ox <sub>3.00</sub> (40 kDa) vs. HA-ADH <sub>3.00</sub> HA-Ox <sub>2.33</sub> (100 kDa) | ns | 0.9882  |
| HA-ADH <sub>3.00</sub> HA-Ox <sub>3.00</sub> (40 kDa) vs. HA-ADH <sub>3.00</sub> HA-Ox <sub>1.00</sub> (100 kDa) | ns | 0.925   |
| HA-ADH <sub>3.00</sub> HA-Ox <sub>3.00</sub> (40 kDa) vs. HA-ADH <sub>2.33</sub> HA-Ox <sub>1.00</sub> (100 kDa) | ns | 0.8254  |
| HA-ADH <sub>3.00</sub> HA-Ox <sub>3.00</sub> (40 kDa) vs. HA-ADH <sub>2.00</sub> HA-Ox <sub>2.00</sub> (100 kDa) | ns | 0.6777  |
| HA-ADH <sub>3.00</sub> HA-Ox <sub>3.00</sub> (40 kDa) vs. HA-ADH <sub>1.67</sub> HA-Ox <sub>3.00</sub> (100 kDa) | ns | 0.7135  |
| HA-ADH <sub>3.00</sub> HA-Ox <sub>3.00</sub> (40 kDa) vs. HA-ADH <sub>1.00</sub> HA-Ox <sub>3.00</sub> (100 kDa) | ns | 0.6983  |
| HA-ADH <sub>3.00</sub> HA-Ox <sub>3.00</sub> (40 kDa) vs. HA-ADH <sub>1.00</sub> HA-Ox <sub>1.67</sub> (100 kDa) | ns | >0.9999 |
| HA-ADH <sub>3.00</sub> HA-Ox <sub>3.00</sub> (40 kDa) vs. HA-ADH <sub>1.00</sub> HA-Ox <sub>1.00</sub> (100 kDa) | ns | 0.9999  |
| HA-ADH <sub>3.00</sub> HA-Ox <sub>1.00</sub> (40 kDa) vs. HA-ADH <sub>2.00</sub> HA-Ox <sub>2.00</sub> (40 kDa)  | ns | >0.9999 |
| HA-ADH <sub>3.00</sub> HA-Ox <sub>1.00</sub> (40 kDa) vs. HA-ADH <sub>1.67</sub> HA-Ox <sub>1.00</sub> (40 kDa)  | ns | >0.9999 |
| HA-ADH <sub>3.00</sub> HA-Ox <sub>1.00</sub> (40 kDa) vs. HA-ADH <sub>1.00</sub> HA-Ox <sub>3.00</sub> (40 kDa)  | ns | >0.9999 |
| HA-ADH <sub>3.00</sub> HA-Ox <sub>1.00</sub> (40 kDa) vs. HA-ADH <sub>1.00</sub> HA-Ox <sub>1.00</sub> (40 kDa)  | ns | 0.9675  |
| HA-ADH <sub>3.00</sub> HA-Ox <sub>1.00</sub> (40 kDa) vs. HA-ADH <sub>3.00</sub> HA-Ox <sub>3.00</sub> (100 kDa) | ns | 0.9998  |
| HA-ADH <sub>3.00</sub> HA-Ox <sub>1.00</sub> (40 kDa) vs. HA-ADH <sub>3.00</sub> HA-Ox <sub>2.33</sub> (100 kDa) | ns | >0.9999 |
| HA-ADH <sub>3.00</sub> HA-Ox <sub>1.00</sub> (40 kDa) vs. HA-ADH <sub>3.00</sub> HA-Ox <sub>1.00</sub> (100 kDa) | ns | >0.9999 |
| HA-ADH <sub>3.00</sub> HA-Ox <sub>1.00</sub> (40 kDa) vs. HA-ADH <sub>2.33</sub> HA-Ox <sub>1.00</sub> (100 kDa) | ns | >0.9999 |
| HA-ADH <sub>3.00</sub> HA-Ox <sub>1.00</sub> (40 kDa) vs. HA-ADH <sub>2.00</sub> HA-Ox <sub>2.00</sub> (100 kDa) | ns | >0.9999 |
| HA-ADH <sub>3.00</sub> HA-Ox <sub>1.00</sub> (40 kDa) vs. HA-ADH <sub>1.67</sub> HA-Ox <sub>3.00</sub> (100 kDa) | ns | 0.9995  |
| HA-ADH <sub>3.00</sub> HA-Ox <sub>1.00</sub> (40 kDa) vs. HA-ADH <sub>1.00</sub> HA-Ox <sub>3.00</sub> (100 kDa) | ns | 0.9984  |
| HA-ADH <sub>3.00</sub> HA-Ox <sub>1.00</sub> (40 kDa) vs. HA-ADH <sub>1.00</sub> HA-Ox <sub>1.67</sub> (100 kDa) | ns | >0.9999 |
| HA-ADH <sub>3.00</sub> HA-Ox <sub>1.00</sub> (40 kDa) vs. HA-ADH <sub>1.00</sub> HA-Ox <sub>1.00</sub> (100 kDa) | ns | >0.9999 |
| HA-ADH <sub>2.00</sub> HA-Ox <sub>2.00</sub> (40 kDa) vs. HA-ADH <sub>1.67</sub> HA-Ox <sub>1.00</sub> (40 kDa)  | ns | >0.9999 |
| HA-ADH <sub>2.00</sub> HA-Ox <sub>2.00</sub> (40 kDa) vs. HA-ADH <sub>1.00</sub> HA-Ox <sub>3.00</sub> (40 kDa)  | ns | >0.9999 |
| HA-ADH <sub>2.00</sub> HA-Ox <sub>2.00</sub> (40 kDa) vs. HA-ADH <sub>1.00</sub> HA-Ox <sub>1.00</sub> (40 kDa)  | ns | 0.5016  |
| HA-ADH <sub>2.00</sub> HA-Ox <sub>2.00</sub> (40 kDa) vs. HA-ADH <sub>3.00</sub> HA-Ox <sub>3.00</sub> (100 kDa) | ns | 0.9642  |
| HA-ADH <sub>2.00</sub> HA-Ox <sub>2.00</sub> (40 kDa) vs. HA-ADH <sub>3.00</sub> HA-Ox <sub>2.33</sub> (100 kDa) | ns | >0.9999 |
| HA-ADH <sub>2.00</sub> HA-Ox <sub>2.00</sub> (40 kDa) vs. HA-ADH <sub>3.00</sub> HA-Ox <sub>1.00</sub> (100 kDa) | ns | >0.9999 |
| HA-ADH <sub>2.00</sub> HA-Ox <sub>2.00</sub> (40 kDa) vs. HA-ADH <sub>2.33</sub> HA-Ox <sub>1.00</sub> (100 kDa) | ns | 0.9982  |
| HA-ADH <sub>2.00</sub> HA-Ox <sub>2.00</sub> (40 kDa) vs. HA-ADH <sub>2.00</sub> HA-Ox <sub>2.00</sub> (100 kDa) | ns | 0.9838  |
| HA-ADH <sub>2.00</sub> HA-Ox <sub>2.00</sub> (40 kDa) vs. HA-ADH <sub>1.67</sub> HA-Ox <sub>3.00</sub> (100 kDa) | ns | 0.9643  |
| HA-ADH <sub>2.00</sub> HA-Ox <sub>2.00</sub> (40 kDa) vs. HA-ADH <sub>1.00</sub> HA-Ox <sub>3.00</sub> (100 kDa) | ns | 0.9371  |
| HA-ADH <sub>2.00</sub> HA-Ox <sub>2.00</sub> (40 kDa) vs. HA-ADH <sub>1.00</sub> HA-Ox <sub>1.67</sub> (100 kDa) | ns | >0.9999 |
| HA-ADH <sub>2.00</sub> HA-Ox <sub>2.00</sub> (40 kDa) vs. HA-ADH <sub>1.00</sub> HA-Ox <sub>1.00</sub> (100 kDa) | ns | >0.9999 |
| HA-ADH <sub>1.67</sub> HA-Ox <sub>1.00</sub> (40 kDa) vs. HA-ADH <sub>1.00</sub> HA-Ox <sub>3.00</sub> (40 kDa)  | ns | 0.9815  |

|                                                                                                                   |    |         |
|-------------------------------------------------------------------------------------------------------------------|----|---------|
| HA-ADH <sub>1.67</sub> HA-Ox <sub>1.00</sub> (40 kDa) vs. HA-ADH <sub>1.00</sub> HA-Ox <sub>1.00</sub> (40 kDa)   | ns | 0.2282  |
| HA-ADH <sub>1.67</sub> HA-Ox <sub>1.00</sub> (40 kDa) vs. HA-ADH <sub>3.00</sub> HA-Ox <sub>3.00</sub> (100 kDa)  | ns | 0.6514  |
| HA-ADH <sub>1.67</sub> HA-Ox <sub>1.00</sub> (40 kDa) vs. HA-ADH <sub>3.00</sub> HA-Ox <sub>2.33</sub> (100 kDa)  | ns | 0.9773  |
| HA-ADH <sub>1.67</sub> HA-Ox <sub>1.00</sub> (40 kDa) vs. HA-ADH <sub>3.00</sub> HA-Ox <sub>1.00</sub> (100 kDa)  | ns | 0.9105  |
| HA-ADH <sub>1.67</sub> HA-Ox <sub>1.00</sub> (40 kDa) vs. HA-ADH <sub>2.33</sub> HA-Ox <sub>1.00</sub> (100 kDa)  | ns | 0.8193  |
| HA-ADH <sub>1.67</sub> HA-Ox <sub>1.00</sub> (40 kDa) vs. HA-ADH <sub>2.00</sub> HA-Ox <sub>2.00</sub> (100 kDa)  | ns | 0.6974  |
| HA-ADH <sub>1.67</sub> HA-Ox <sub>1.00</sub> (40 kDa) vs. HA-ADH <sub>1.67</sub> HA-Ox <sub>3.00</sub> (100 kDa)  | ns | 0.7032  |
| HA-ADH <sub>1.67</sub> HA-Ox <sub>1.00</sub> (40 kDa) vs. HA-ADH <sub>1.00</sub> HA-Ox <sub>3.00</sub> (100 kDa)  | ns | 0.6834  |
| HA-ADH <sub>1.67</sub> HA-Ox <sub>1.00</sub> (40 kDa) vs. HA-ADH <sub>1.00</sub> HA-Ox <sub>1.67</sub> (100 kDa)  | ns | >0.9999 |
| HA-ADH <sub>1.67</sub> HA-Ox <sub>1.00</sub> (40 kDa) vs. HA-ADH <sub>1.00</sub> HA-Ox <sub>1.00</sub> (100 kDa)  | ns | 0.9988  |
| HA-ADH <sub>1.00</sub> HA-Ox <sub>3.00</sub> (40 kDa) vs. HA-ADH <sub>1.00</sub> HA-Ox <sub>1.00</sub> (40 kDa)   | ns | 0.9026  |
| HA-ADH <sub>1.00</sub> HA-Ox <sub>3.00</sub> (40 kDa) vs. HA-ADH <sub>3.00</sub> HA-Ox <sub>3.00</sub> (100 kDa)  | ns | >0.9999 |
| HA-ADH <sub>1.00</sub> HA-Ox <sub>3.00</sub> (40 kDa) vs. HA-ADH <sub>3.00</sub> HA-Ox <sub>2.33</sub> (100 kDa)  | ns | >0.9999 |
| HA-ADH <sub>1.00</sub> HA-Ox <sub>3.00</sub> (40 kDa) vs. HA-ADH <sub>3.00</sub> HA-Ox <sub>1.00</sub> (100 kDa)  | ns | >0.9999 |
| HA-ADH <sub>1.00</sub> HA-Ox <sub>3.00</sub> (40 kDa) vs. HA-ADH <sub>2.33</sub> HA-Ox <sub>1.00</sub> (100 kDa)  | ns | >0.9999 |
| HA-ADH <sub>1.00</sub> HA-Ox <sub>3.00</sub> (40 kDa) vs. HA-ADH <sub>2.00</sub> HA-Ox <sub>2.00</sub> (100 kDa)  | ns | >0.9999 |
| HA-ADH <sub>1.00</sub> HA-Ox <sub>3.00</sub> (40 kDa) vs. HA-ADH <sub>1.67</sub> HA-Ox <sub>3.00</sub> (100 kDa)  | ns | >0.9999 |
| HA-ADH <sub>1.00</sub> HA-Ox <sub>3.00</sub> (40 kDa) vs. HA-ADH <sub>1.00</sub> HA-Ox <sub>3.00</sub> (100 kDa)  | ns | 0.9999  |
| HA-ADH <sub>1.00</sub> HA-Ox <sub>3.00</sub> (40 kDa) vs. HA-ADH <sub>1.00</sub> HA-Ox <sub>1.67</sub> (100 kDa)  | ns | 0.9997  |
| HA-ADH <sub>1.00</sub> HA-Ox <sub>3.00</sub> (40 kDa) vs. HA-ADH <sub>1.00</sub> HA-Ox <sub>1.00</sub> (100 kDa)  | ns | 0.9974  |
| HA-ADH <sub>1.00</sub> HA-Ox <sub>1.00</sub> (40 kDa) vs. HA-ADH <sub>3.00</sub> HA-Ox <sub>3.00</sub> (100 kDa)  | ns | 0.5108  |
| HA-ADH <sub>1.00</sub> HA-Ox <sub>1.00</sub> (40 kDa) vs. HA-ADH <sub>3.00</sub> HA-Ox <sub>2.33</sub> (100 kDa)  | ns | 0.1558  |
| HA-ADH <sub>1.00</sub> HA-Ox <sub>1.00</sub> (40 kDa) vs. HA-ADH <sub>3.00</sub> HA-Ox <sub>1.00</sub> (100 kDa)  | ns | 0.1621  |
| HA-ADH <sub>1.00</sub> HA-Ox <sub>1.00</sub> (40 kDa) vs. HA-ADH <sub>2.33</sub> HA-Ox <sub>1.00</sub> (100 kDa)  | ns | 0.2364  |
| HA-ADH <sub>1.00</sub> HA-Ox <sub>1.00</sub> (40 kDa) vs. HA-ADH <sub>2.00</sub> HA-Ox <sub>2.00</sub> (100 kDa)  | ns | 0.2819  |
| HA-ADH <sub>1.00</sub> HA-Ox <sub>1.00</sub> (40 kDa) vs. HA-ADH <sub>1.67</sub> HA-Ox <sub>3.00</sub> (100 kDa)  | ns | 0.9047  |
| HA-ADH <sub>1.00</sub> HA-Ox <sub>1.00</sub> (40 kDa) vs. HA-ADH <sub>1.00</sub> HA-Ox <sub>3.00</sub> (100 kDa)  | ns | 0.9944  |
| HA-ADH <sub>1.00</sub> HA-Ox <sub>1.00</sub> (40 kDa) vs. HA-ADH <sub>1.00</sub> HA-Ox <sub>1.67</sub> (100 kDa)  | ns | 0.3217  |
| HA-ADH <sub>1.00</sub> HA-Ox <sub>1.00</sub> (40 kDa) vs. HA-ADH <sub>1.00</sub> HA-Ox <sub>1.00</sub> (100 kDa)  | ns | 0.0907  |
| HA-ADH <sub>3.00</sub> HA-Ox <sub>3.00</sub> (100 kDa) vs. HA-ADH <sub>3.00</sub> HA-Ox <sub>2.33</sub> (100 kDa) | ns | 0.8528  |
| HA-ADH <sub>3.00</sub> HA-Ox <sub>3.00</sub> (100 kDa) vs. HA-ADH <sub>3.00</sub> HA-Ox <sub>1.00</sub> (100 kDa) | ns | 0.8863  |
| HA-ADH <sub>3.00</sub> HA-Ox <sub>3.00</sub> (100 kDa) vs. HA-ADH <sub>2.33</sub> HA-Ox <sub>1.00</sub> (100 kDa) | ns | 0.9957  |
| HA-ADH <sub>3.00</sub> HA-Ox <sub>3.00</sub> (100 kDa) vs. HA-ADH <sub>2.00</sub> HA-Ox <sub>2.00</sub> (100 kDa) | ns | 0.9992  |
| HA-ADH <sub>3.00</sub> HA-Ox <sub>3.00</sub> (100 kDa) vs. HA-ADH <sub>1.67</sub> HA-Ox <sub>3.00</sub> (100 kDa) | ns | >0.9999 |
| HA-ADH <sub>3.00</sub> HA-Ox <sub>3.00</sub> (100 kDa) vs. HA-ADH <sub>1.00</sub> HA-Ox <sub>3.00</sub> (100 kDa) | ns | 0.9998  |
| HA-ADH <sub>3.00</sub> HA-Ox <sub>3.00</sub> (100 kDa) vs. HA-ADH <sub>1.00</sub> HA-Ox <sub>1.67</sub> (100 kDa) | ns | 0.8928  |
| HA-ADH <sub>3.00</sub> HA-Ox <sub>3.00</sub> (100 kDa) vs. HA-ADH <sub>1.00</sub> HA-Ox <sub>1.00</sub> (100 kDa) | ns | 0.5199  |
| HA-ADH <sub>3.00</sub> HA-Ox <sub>2.33</sub> (100 kDa) vs. HA-ADH <sub>3.00</sub> HA-Ox <sub>1.00</sub> (100 kDa) | ns | >0.9999 |
| HA-ADH <sub>3.00</sub> HA-Ox <sub>2.33</sub> (100 kDa) vs. HA-ADH <sub>2.33</sub> HA-Ox <sub>1.00</sub> (100 kDa) | ns | 0.9949  |

|                                                                                                                   |    |         |
|-------------------------------------------------------------------------------------------------------------------|----|---------|
| HA-ADH <sub>3.00</sub> HA-Ox <sub>2.33</sub> (100 kDa) vs. HA-ADH <sub>2.00</sub> HA-Ox <sub>2.00</sub> (100 kDa) | ns | 0.8492  |
| HA-ADH <sub>3.00</sub> HA-Ox <sub>2.33</sub> (100 kDa) vs. HA-ADH <sub>1.67</sub> HA-Ox <sub>3.00</sub> (100 kDa) | ns | 0.9104  |
| HA-ADH <sub>3.00</sub> HA-Ox <sub>2.33</sub> (100 kDa) vs. HA-ADH <sub>1.00</sub> HA-Ox <sub>3.00</sub> (100 kDa) | ns | 0.8787  |
| HA-ADH <sub>3.00</sub> HA-Ox <sub>2.33</sub> (100 kDa) vs. HA-ADH <sub>1.00</sub> HA-Ox <sub>1.67</sub> (100 kDa) | ns | >0.9999 |
| HA-ADH <sub>3.00</sub> HA-Ox <sub>2.33</sub> (100 kDa) vs. HA-ADH <sub>1.00</sub> HA-Ox <sub>1.00</sub> (100 kDa) | ns | 0.9996  |
| HA-ADH <sub>3.00</sub> HA-Ox <sub>1.00</sub> (100 kDa) vs. HA-ADH <sub>2.33</sub> HA-Ox <sub>1.00</sub> (100 kDa) | ns | 0.9997  |
| HA-ADH <sub>3.00</sub> HA-Ox <sub>1.00</sub> (100 kDa) vs. HA-ADH <sub>2.00</sub> HA-Ox <sub>2.00</sub> (100 kDa) | ns | 0.8427  |
| HA-ADH <sub>3.00</sub> HA-Ox <sub>1.00</sub> (100 kDa) vs. HA-ADH <sub>1.67</sub> HA-Ox <sub>3.00</sub> (100 kDa) | ns | 0.9397  |
| HA-ADH <sub>3.00</sub> HA-Ox <sub>1.00</sub> (100 kDa) vs. HA-ADH <sub>1.00</sub> HA-Ox <sub>3.00</sub> (100 kDa) | ns | 0.9102  |
| HA-ADH <sub>3.00</sub> HA-Ox <sub>1.00</sub> (100 kDa) vs. HA-ADH <sub>1.00</sub> HA-Ox <sub>1.67</sub> (100 kDa) | ns | 0.9995  |
| HA-ADH <sub>3.00</sub> HA-Ox <sub>1.00</sub> (100 kDa) vs. HA-ADH <sub>1.00</sub> HA-Ox <sub>1.00</sub> (100 kDa) | ns | 0.9477  |
| HA-ADH <sub>2.33</sub> HA-Ox <sub>1.00</sub> (100 kDa) vs. HA-ADH <sub>2.00</sub> HA-Ox <sub>2.00</sub> (100 kDa) | ns | 0.9999  |
| HA-ADH <sub>2.33</sub> HA-Ox <sub>1.00</sub> (100 kDa) vs. HA-ADH <sub>1.67</sub> HA-Ox <sub>3.00</sub> (100 kDa) | ns | 0.9929  |
| HA-ADH <sub>2.33</sub> HA-Ox <sub>1.00</sub> (100 kDa) vs. HA-ADH <sub>1.00</sub> HA-Ox <sub>3.00</sub> (100 kDa) | ns | 0.9743  |
| HA-ADH <sub>2.33</sub> HA-Ox <sub>1.00</sub> (100 kDa) vs. HA-ADH <sub>1.00</sub> HA-Ox <sub>1.67</sub> (100 kDa) | ns | 0.9875  |
| HA-ADH <sub>2.33</sub> HA-Ox <sub>1.00</sub> (100 kDa) vs. HA-ADH <sub>1.00</sub> HA-Ox <sub>1.00</sub> (100 kDa) | ns | 0.7805  |
| HA-ADH <sub>2.00</sub> HA-Ox <sub>2.00</sub> (100 kDa) vs. HA-ADH <sub>1.67</sub> HA-Ox <sub>3.00</sub> (100 kDa) | ns | 0.998   |
| HA-ADH <sub>2.00</sub> HA-Ox <sub>2.00</sub> (100 kDa) vs. HA-ADH <sub>1.00</sub> HA-Ox <sub>3.00</sub> (100 kDa) | ns | 0.9868  |
| HA-ADH <sub>2.00</sub> HA-Ox <sub>2.00</sub> (100 kDa) vs. HA-ADH <sub>1.00</sub> HA-Ox <sub>1.67</sub> (100 kDa) | ns | 0.9256  |
| HA-ADH <sub>2.00</sub> HA-Ox <sub>2.00</sub> (100 kDa) vs. HA-ADH <sub>1.00</sub> HA-Ox <sub>1.00</sub> (100 kDa) | ns | 0.4203  |
| HA-ADH <sub>1.67</sub> HA-Ox <sub>3.00</sub> (100 kDa) vs. HA-ADH <sub>1.00</sub> HA-Ox <sub>3.00</sub> (100 kDa) | ns | >0.9999 |
| HA-ADH <sub>1.67</sub> HA-Ox <sub>3.00</sub> (100 kDa) vs. HA-ADH <sub>1.00</sub> HA-Ox <sub>1.67</sub> (100 kDa) | ns | 0.9126  |
| HA-ADH <sub>1.67</sub> HA-Ox <sub>3.00</sub> (100 kDa) vs. HA-ADH <sub>1.00</sub> HA-Ox <sub>1.00</sub> (100 kDa) | ns | 0.7366  |
| HA-ADH <sub>1.00</sub> HA-Ox <sub>3.00</sub> (100 kDa) vs. HA-ADH <sub>1.00</sub> HA-Ox <sub>1.67</sub> (100 kDa) | ns | 0.8762  |
| HA-ADH <sub>1.00</sub> HA-Ox <sub>3.00</sub> (100 kDa) vs. HA-ADH <sub>1.00</sub> HA-Ox <sub>1.00</sub> (100 kDa) | ns | 0.7393  |
| HA-ADH <sub>1.00</sub> HA-Ox <sub>1.67</sub> (100 kDa) vs. HA-ADH <sub>1.00</sub> HA-Ox <sub>1.00</sub> (100 kDa) | ns | >0.9999 |
| <b>Day 14</b>                                                                                                     |    |         |
| HA-ADH <sub>3.00</sub> HA-Ox <sub>3.00</sub> (40 kDa) vs. HA-ADH <sub>3.00</sub> HA-Ox <sub>1.00</sub> (40 kDa)   | ns | 0.4582  |
| HA-ADH <sub>3.00</sub> HA-Ox <sub>3.00</sub> (40 kDa) vs. HA-ADH <sub>2.00</sub> HA-Ox <sub>2.00</sub> (40 kDa)   | ns | >0.9999 |
| HA-ADH <sub>3.00</sub> HA-Ox <sub>3.00</sub> (40 kDa) vs. HA-ADH <sub>1.67</sub> HA-Ox <sub>1.00</sub> (40 kDa)   | ns | 0.8718  |
| HA-ADH <sub>3.00</sub> HA-Ox <sub>3.00</sub> (40 kDa) vs. HA-ADH <sub>1.00</sub> HA-Ox <sub>3.00</sub> (40 kDa)   | ns | 0.1187  |
| HA-ADH <sub>3.00</sub> HA-Ox <sub>3.00</sub> (40 kDa) vs. HA-ADH <sub>1.00</sub> HA-Ox <sub>1.00</sub> (40 kDa)   | ns | 0.1181  |
| HA-ADH <sub>3.00</sub> HA-Ox <sub>3.00</sub> (40 kDa) vs. HA-ADH <sub>3.00</sub> HA-Ox <sub>3.00</sub> (100 kDa)  | ns | 0.5724  |
| HA-ADH <sub>3.00</sub> HA-Ox <sub>3.00</sub> (40 kDa) vs. HA-ADH <sub>3.00</sub> HA-Ox <sub>2.33</sub> (100 kDa)  | ns | 0.9227  |
| HA-ADH <sub>3.00</sub> HA-Ox <sub>3.00</sub> (40 kDa) vs. HA-ADH <sub>3.00</sub> HA-Ox <sub>1.00</sub> (100 kDa)  | ns | 0.991   |
| HA-ADH <sub>3.00</sub> HA-Ox <sub>3.00</sub> (40 kDa) vs. HA-ADH <sub>2.33</sub> HA-Ox <sub>1.00</sub> (100 kDa)  | ns | 0.9455  |
| HA-ADH <sub>3.00</sub> HA-Ox <sub>3.00</sub> (40 kDa) vs. HA-ADH <sub>2.00</sub> HA-Ox <sub>2.00</sub> (100 kDa)  | ns | 0.5572  |
| HA-ADH <sub>3.00</sub> HA-Ox <sub>3.00</sub> (40 kDa) vs. HA-ADH <sub>1.67</sub> HA-Ox <sub>3.00</sub> (100 kDa)  | ns | 0.6568  |
| HA-ADH <sub>3.00</sub> HA-Ox <sub>3.00</sub> (40 kDa) vs. HA-ADH <sub>1.00</sub> HA-Ox <sub>3.00</sub> (100 kDa)  | ns | 0.2582  |

|                                                                                                                  |    |         |
|------------------------------------------------------------------------------------------------------------------|----|---------|
| HA-ADH <sub>3.00</sub> HA-Ox <sub>3.00</sub> (40 kDa) vs. HA-ADH <sub>1.00</sub> HA-Ox <sub>1.67</sub> (100 kDa) | ns | 0.5764  |
| HA-ADH <sub>3.00</sub> HA-Ox <sub>3.00</sub> (40 kDa) vs. HA-ADH <sub>1.00</sub> HA-Ox <sub>1.00</sub> (100 kDa) | ns | 0.737   |
| HA-ADH <sub>3.00</sub> HA-Ox <sub>1.00</sub> (40 kDa) vs. HA-ADH <sub>2.00</sub> HA-Ox <sub>2.00</sub> (40 kDa)  | ns | 0.3856  |
| HA-ADH <sub>3.00</sub> HA-Ox <sub>1.00</sub> (40 kDa) vs. HA-ADH <sub>1.67</sub> HA-Ox <sub>1.00</sub> (40 kDa)  | ns | 0.7673  |
| HA-ADH <sub>3.00</sub> HA-Ox <sub>1.00</sub> (40 kDa) vs. HA-ADH <sub>1.00</sub> HA-Ox <sub>3.00</sub> (40 kDa)  | ns | 0.0613  |
| HA-ADH <sub>3.00</sub> HA-Ox <sub>1.00</sub> (40 kDa) vs. HA-ADH <sub>1.00</sub> HA-Ox <sub>1.00</sub> (40 kDa)  | ns | 0.0607  |
| HA-ADH <sub>3.00</sub> HA-Ox <sub>1.00</sub> (40 kDa) vs. HA-ADH <sub>3.00</sub> HA-Ox <sub>3.00</sub> (100 kDa) | ns | 0.1396  |
| HA-ADH <sub>3.00</sub> HA-Ox <sub>1.00</sub> (40 kDa) vs. HA-ADH <sub>3.00</sub> HA-Ox <sub>2.33</sub> (100 kDa) | ns | 0.2126  |
| HA-ADH <sub>3.00</sub> HA-Ox <sub>1.00</sub> (40 kDa) vs. HA-ADH <sub>3.00</sub> HA-Ox <sub>1.00</sub> (100 kDa) | ns | 0.2473  |
| HA-ADH <sub>3.00</sub> HA-Ox <sub>1.00</sub> (40 kDa) vs. HA-ADH <sub>2.33</sub> HA-Ox <sub>1.00</sub> (100 kDa) | ns | 0.1941  |
| HA-ADH <sub>3.00</sub> HA-Ox <sub>1.00</sub> (40 kDa) vs. HA-ADH <sub>2.00</sub> HA-Ox <sub>2.00</sub> (100 kDa) | ns | 0.1354  |
| HA-ADH <sub>3.00</sub> HA-Ox <sub>1.00</sub> (40 kDa) vs. HA-ADH <sub>1.67</sub> HA-Ox <sub>3.00</sub> (100 kDa) | ns | 0.1381  |
| HA-ADH <sub>3.00</sub> HA-Ox <sub>1.00</sub> (40 kDa) vs. HA-ADH <sub>1.00</sub> HA-Ox <sub>3.00</sub> (100 kDa) | ns | 0.0589  |
| HA-ADH <sub>3.00</sub> HA-Ox <sub>1.00</sub> (40 kDa) vs. HA-ADH <sub>1.00</sub> HA-Ox <sub>1.67</sub> (100 kDa) | ns | 0.0993  |
| HA-ADH <sub>3.00</sub> HA-Ox <sub>1.00</sub> (40 kDa) vs. HA-ADH <sub>1.00</sub> HA-Ox <sub>1.00</sub> (100 kDa) | ns | 0.1289  |
| HA-ADH <sub>2.00</sub> HA-Ox <sub>2.00</sub> (40 kDa) vs. HA-ADH <sub>1.67</sub> HA-Ox <sub>1.00</sub> (40 kDa)  | ns | 0.641   |
| HA-ADH <sub>2.00</sub> HA-Ox <sub>2.00</sub> (40 kDa) vs. HA-ADH <sub>1.00</sub> HA-Ox <sub>3.00</sub> (40 kDa)  | *  | 0.031   |
| HA-ADH <sub>2.00</sub> HA-Ox <sub>2.00</sub> (40 kDa) vs. HA-ADH <sub>1.00</sub> HA-Ox <sub>1.00</sub> (40 kDa)  | *  | 0.0291  |
| HA-ADH <sub>2.00</sub> HA-Ox <sub>2.00</sub> (40 kDa) vs. HA-ADH <sub>3.00</sub> HA-Ox <sub>3.00</sub> (100 kDa) | ns | 0.1527  |
| HA-ADH <sub>2.00</sub> HA-Ox <sub>2.00</sub> (40 kDa) vs. HA-ADH <sub>3.00</sub> HA-Ox <sub>2.33</sub> (100 kDa) | ns | 0.4779  |
| HA-ADH <sub>2.00</sub> HA-Ox <sub>2.00</sub> (40 kDa) vs. HA-ADH <sub>3.00</sub> HA-Ox <sub>1.00</sub> (100 kDa) | ns | 0.7365  |
| HA-ADH <sub>2.00</sub> HA-Ox <sub>2.00</sub> (40 kDa) vs. HA-ADH <sub>2.33</sub> HA-Ox <sub>1.00</sub> (100 kDa) | ns | 0.5914  |
| HA-ADH <sub>2.00</sub> HA-Ox <sub>2.00</sub> (40 kDa) vs. HA-ADH <sub>2.00</sub> HA-Ox <sub>2.00</sub> (100 kDa) | ns | 0.1439  |
| HA-ADH <sub>2.00</sub> HA-Ox <sub>2.00</sub> (40 kDa) vs. HA-ADH <sub>1.67</sub> HA-Ox <sub>3.00</sub> (100 kDa) | ns | 0.208   |
| HA-ADH <sub>2.00</sub> HA-Ox <sub>2.00</sub> (40 kDa) vs. HA-ADH <sub>1.00</sub> HA-Ox <sub>3.00</sub> (100 kDa) | ns | 0.0852  |
| HA-ADH <sub>2.00</sub> HA-Ox <sub>2.00</sub> (40 kDa) vs. HA-ADH <sub>1.00</sub> HA-Ox <sub>1.67</sub> (100 kDa) | ns | 0.2629  |
| HA-ADH <sub>2.00</sub> HA-Ox <sub>2.00</sub> (40 kDa) vs. HA-ADH <sub>1.00</sub> HA-Ox <sub>1.00</sub> (100 kDa) | ns | 0.3485  |
| HA-ADH <sub>1.67</sub> HA-Ox <sub>1.00</sub> (40 kDa) vs. HA-ADH <sub>1.00</sub> HA-Ox <sub>3.00</sub> (40 kDa)  | *  | 0.0156  |
| HA-ADH <sub>1.67</sub> HA-Ox <sub>1.00</sub> (40 kDa) vs. HA-ADH <sub>1.00</sub> HA-Ox <sub>1.00</sub> (40 kDa)  | *  | 0.0141  |
| HA-ADH <sub>1.67</sub> HA-Ox <sub>1.00</sub> (40 kDa) vs. HA-ADH <sub>3.00</sub> HA-Ox <sub>3.00</sub> (100 kDa) | *  | 0.0325  |
| HA-ADH <sub>1.67</sub> HA-Ox <sub>1.00</sub> (40 kDa) vs. HA-ADH <sub>3.00</sub> HA-Ox <sub>2.33</sub> (100 kDa) | ns | 0.0959  |
| HA-ADH <sub>1.67</sub> HA-Ox <sub>1.00</sub> (40 kDa) vs. HA-ADH <sub>3.00</sub> HA-Ox <sub>1.00</sub> (100 kDa) | ns | 0.1362  |
| HA-ADH <sub>1.67</sub> HA-Ox <sub>1.00</sub> (40 kDa) vs. HA-ADH <sub>2.33</sub> HA-Ox <sub>1.00</sub> (100 kDa) | ns | 0.0983  |
| HA-ADH <sub>1.67</sub> HA-Ox <sub>1.00</sub> (40 kDa) vs. HA-ADH <sub>2.00</sub> HA-Ox <sub>2.00</sub> (100 kDa) | *  | 0.03    |
| HA-ADH <sub>1.67</sub> HA-Ox <sub>1.00</sub> (40 kDa) vs. HA-ADH <sub>1.67</sub> HA-Ox <sub>3.00</sub> (100 kDa) | *  | 0.0385  |
| HA-ADH <sub>1.67</sub> HA-Ox <sub>1.00</sub> (40 kDa) vs. HA-ADH <sub>1.00</sub> HA-Ox <sub>3.00</sub> (100 kDa) | *  | 0.0326  |
| HA-ADH <sub>1.67</sub> HA-Ox <sub>1.00</sub> (40 kDa) vs. HA-ADH <sub>1.00</sub> HA-Ox <sub>1.67</sub> (100 kDa) | ns | 0.083   |
| HA-ADH <sub>1.67</sub> HA-Ox <sub>1.00</sub> (40 kDa) vs. HA-ADH <sub>1.00</sub> HA-Ox <sub>1.00</sub> (100 kDa) | ns | 0.0859  |
| HA-ADH <sub>1.00</sub> HA-Ox <sub>3.00</sub> (40 kDa) vs. HA-ADH <sub>1.00</sub> HA-Ox <sub>1.00</sub> (40 kDa)  | ns | >0.9999 |

|                                                                                                                   |    |         |
|-------------------------------------------------------------------------------------------------------------------|----|---------|
| HA-ADH <sub>1.00</sub> HA-Ox <sub>3.00</sub> (40 kDa) vs. HA-ADH <sub>3.00</sub> HA-Ox <sub>3.00</sub> (100 kDa)  | *  | 0.0231  |
| HA-ADH <sub>1.00</sub> HA-Ox <sub>3.00</sub> (40 kDa) vs. HA-ADH <sub>3.00</sub> HA-Ox <sub>2.33</sub> (100 kDa)  | ** | 0.0054  |
| HA-ADH <sub>1.00</sub> HA-Ox <sub>3.00</sub> (40 kDa) vs. HA-ADH <sub>3.00</sub> HA-Ox <sub>1.00</sub> (100 kDa)  | ** | 0.0057  |
| HA-ADH <sub>1.00</sub> HA-Ox <sub>3.00</sub> (40 kDa) vs. HA-ADH <sub>2.33</sub> HA-Ox <sub>1.00</sub> (100 kDa)  | *  | 0.0362  |
| HA-ADH <sub>1.00</sub> HA-Ox <sub>3.00</sub> (40 kDa) vs. HA-ADH <sub>2.00</sub> HA-Ox <sub>2.00</sub> (100 kDa)  | *  | 0.0282  |
| HA-ADH <sub>1.00</sub> HA-Ox <sub>3.00</sub> (40 kDa) vs. HA-ADH <sub>1.67</sub> HA-Ox <sub>3.00</sub> (100 kDa)  | *  | 0.0481  |
| HA-ADH <sub>1.00</sub> HA-Ox <sub>3.00</sub> (40 kDa) vs. HA-ADH <sub>1.00</sub> HA-Ox <sub>3.00</sub> (100 kDa)  | ns | 0.362   |
| HA-ADH <sub>1.00</sub> HA-Ox <sub>3.00</sub> (40 kDa) vs. HA-ADH <sub>1.00</sub> HA-Ox <sub>1.67</sub> (100 kDa)  | ns | 0.1778  |
| HA-ADH <sub>1.00</sub> HA-Ox <sub>3.00</sub> (40 kDa) vs. HA-ADH <sub>1.00</sub> HA-Ox <sub>1.00</sub> (100 kDa)  | ns | 0.1041  |
| HA-ADH <sub>1.00</sub> HA-Ox <sub>1.00</sub> (40 kDa) vs. HA-ADH <sub>3.00</sub> HA-Ox <sub>3.00</sub> (100 kDa)  | *  | 0.0188  |
| HA-ADH <sub>1.00</sub> HA-Ox <sub>1.00</sub> (40 kDa) vs. HA-ADH <sub>3.00</sub> HA-Ox <sub>2.33</sub> (100 kDa)  | ** | 0.0027  |
| HA-ADH <sub>1.00</sub> HA-Ox <sub>1.00</sub> (40 kDa) vs. HA-ADH <sub>3.00</sub> HA-Ox <sub>1.00</sub> (100 kDa)  | ** | 0.0031  |
| HA-ADH <sub>1.00</sub> HA-Ox <sub>1.00</sub> (40 kDa) vs. HA-ADH <sub>2.33</sub> HA-Ox <sub>1.00</sub> (100 kDa)  | *  | 0.0333  |
| HA-ADH <sub>1.00</sub> HA-Ox <sub>1.00</sub> (40 kDa) vs. HA-ADH <sub>2.00</sub> HA-Ox <sub>2.00</sub> (100 kDa)  | *  | 0.0237  |
| HA-ADH <sub>1.00</sub> HA-Ox <sub>1.00</sub> (40 kDa) vs. HA-ADH <sub>1.67</sub> HA-Ox <sub>3.00</sub> (100 kDa)  | *  | 0.0444  |
| HA-ADH <sub>1.00</sub> HA-Ox <sub>1.00</sub> (40 kDa) vs. HA-ADH <sub>1.00</sub> HA-Ox <sub>3.00</sub> (100 kDa)  | ns | 0.3645  |
| HA-ADH <sub>1.00</sub> HA-Ox <sub>1.00</sub> (40 kDa) vs. HA-ADH <sub>1.00</sub> HA-Ox <sub>1.67</sub> (100 kDa)  | ns | 0.1769  |
| HA-ADH <sub>1.00</sub> HA-Ox <sub>1.00</sub> (40 kDa) vs. HA-ADH <sub>1.00</sub> HA-Ox <sub>1.00</sub> (100 kDa)  | ns | 0.1021  |
| HA-ADH <sub>3.00</sub> HA-Ox <sub>3.00</sub> (100 kDa) vs. HA-ADH <sub>3.00</sub> HA-Ox <sub>2.33</sub> (100 kDa) | ns | 0.3062  |
| HA-ADH <sub>3.00</sub> HA-Ox <sub>3.00</sub> (100 kDa) vs. HA-ADH <sub>3.00</sub> HA-Ox <sub>1.00</sub> (100 kDa) | ns | 0.1386  |
| HA-ADH <sub>3.00</sub> HA-Ox <sub>3.00</sub> (100 kDa) vs. HA-ADH <sub>2.33</sub> HA-Ox <sub>1.00</sub> (100 kDa) | ns | 0.6462  |
| HA-ADH <sub>3.00</sub> HA-Ox <sub>3.00</sub> (100 kDa) vs. HA-ADH <sub>2.00</sub> HA-Ox <sub>2.00</sub> (100 kDa) | ns | >0.9999 |
| HA-ADH <sub>3.00</sub> HA-Ox <sub>3.00</sub> (100 kDa) vs. HA-ADH <sub>1.67</sub> HA-Ox <sub>3.00</sub> (100 kDa) | ns | >0.9999 |
| HA-ADH <sub>3.00</sub> HA-Ox <sub>3.00</sub> (100 kDa) vs. HA-ADH <sub>1.00</sub> HA-Ox <sub>3.00</sub> (100 kDa) | ns | 0.6112  |
| HA-ADH <sub>3.00</sub> HA-Ox <sub>3.00</sub> (100 kDa) vs. HA-ADH <sub>1.00</sub> HA-Ox <sub>1.67</sub> (100 kDa) | ns | >0.9999 |
| HA-ADH <sub>3.00</sub> HA-Ox <sub>3.00</sub> (100 kDa) vs. HA-ADH <sub>1.00</sub> HA-Ox <sub>1.00</sub> (100 kDa) | ns | >0.9999 |
| HA-ADH <sub>3.00</sub> HA-Ox <sub>2.33</sub> (100 kDa) vs. HA-ADH <sub>3.00</sub> HA-Ox <sub>1.00</sub> (100 kDa) | ns | 0.9148  |
| HA-ADH <sub>3.00</sub> HA-Ox <sub>2.33</sub> (100 kDa) vs. HA-ADH <sub>2.33</sub> HA-Ox <sub>1.00</sub> (100 kDa) | ns | >0.9999 |
| HA-ADH <sub>3.00</sub> HA-Ox <sub>2.33</sub> (100 kDa) vs. HA-ADH <sub>2.00</sub> HA-Ox <sub>2.00</sub> (100 kDa) | ns | 0.3058  |
| HA-ADH <sub>3.00</sub> HA-Ox <sub>2.33</sub> (100 kDa) vs. HA-ADH <sub>1.67</sub> HA-Ox <sub>3.00</sub> (100 kDa) | ns | 0.6844  |
| HA-ADH <sub>3.00</sub> HA-Ox <sub>2.33</sub> (100 kDa) vs. HA-ADH <sub>1.00</sub> HA-Ox <sub>3.00</sub> (100 kDa) | ns | 0.2558  |
| HA-ADH <sub>3.00</sub> HA-Ox <sub>2.33</sub> (100 kDa) vs. HA-ADH <sub>1.00</sub> HA-Ox <sub>1.67</sub> (100 kDa) | ns | 0.7057  |
| HA-ADH <sub>3.00</sub> HA-Ox <sub>2.33</sub> (100 kDa) vs. HA-ADH <sub>1.00</sub> HA-Ox <sub>1.00</sub> (100 kDa) | ns | 0.9137  |
| HA-ADH <sub>3.00</sub> HA-Ox <sub>1.00</sub> (100 kDa) vs. HA-ADH <sub>2.33</sub> HA-Ox <sub>1.00</sub> (100 kDa) | ns | 0.9914  |
| HA-ADH <sub>3.00</sub> HA-Ox <sub>1.00</sub> (100 kDa) vs. HA-ADH <sub>2.00</sub> HA-Ox <sub>2.00</sub> (100 kDa) | ns | 0.145   |
| HA-ADH <sub>3.00</sub> HA-Ox <sub>1.00</sub> (100 kDa) vs. HA-ADH <sub>1.67</sub> HA-Ox <sub>3.00</sub> (100 kDa) | ns | 0.3953  |
| HA-ADH <sub>3.00</sub> HA-Ox <sub>1.00</sub> (100 kDa) vs. HA-ADH <sub>1.00</sub> HA-Ox <sub>3.00</sub> (100 kDa) | ns | 0.1926  |
| HA-ADH <sub>3.00</sub> HA-Ox <sub>1.00</sub> (100 kDa) vs. HA-ADH <sub>1.00</sub> HA-Ox <sub>1.67</sub> (100 kDa) | ns | 0.5219  |
| HA-ADH <sub>3.00</sub> HA-Ox <sub>1.00</sub> (100 kDa) vs. HA-ADH <sub>1.00</sub> HA-Ox <sub>1.00</sub> (100 kDa) | ns | 0.6955  |



|                                                                                                                   |    |         |
|-------------------------------------------------------------------------------------------------------------------|----|---------|
| HA-ADH <sub>2.33</sub> HA-Ox <sub>1.00</sub> (100 kDa) vs. HA-ADH <sub>2.00</sub> HA-Ox <sub>2.00</sub> (100 kDa) | ns | 0.6174  |
| HA-ADH <sub>2.33</sub> HA-Ox <sub>1.00</sub> (100 kDa) vs. HA-ADH <sub>1.67</sub> HA-Ox <sub>3.00</sub> (100 kDa) | ns | 0.8849  |
| HA-ADH <sub>2.33</sub> HA-Ox <sub>1.00</sub> (100 kDa) vs. HA-ADH <sub>1.00</sub> HA-Ox <sub>3.00</sub> (100 kDa) | ns | 0.2652  |
| HA-ADH <sub>2.33</sub> HA-Ox <sub>1.00</sub> (100 kDa) vs. HA-ADH <sub>1.00</sub> HA-Ox <sub>1.67</sub> (100 kDa) | ns | 0.8038  |
| HA-ADH <sub>2.33</sub> HA-Ox <sub>1.00</sub> (100 kDa) vs. HA-ADH <sub>1.00</sub> HA-Ox <sub>1.00</sub> (100 kDa) | ns | 0.974   |
| HA-ADH <sub>2.00</sub> HA-Ox <sub>2.00</sub> (100 kDa) vs. HA-ADH <sub>1.67</sub> HA-Ox <sub>3.00</sub> (100 kDa) | ns | >0.9999 |
| HA-ADH <sub>2.00</sub> HA-Ox <sub>2.00</sub> (100 kDa) vs. HA-ADH <sub>1.00</sub> HA-Ox <sub>3.00</sub> (100 kDa) | ns | 0.6462  |
| HA-ADH <sub>2.00</sub> HA-Ox <sub>2.00</sub> (100 kDa) vs. HA-ADH <sub>1.00</sub> HA-Ox <sub>1.67</sub> (100 kDa) | ns | >0.9999 |
| HA-ADH <sub>2.00</sub> HA-Ox <sub>2.00</sub> (100 kDa) vs. HA-ADH <sub>1.00</sub> HA-Ox <sub>1.00</sub> (100 kDa) | ns | >0.9999 |
| HA-ADH <sub>1.67</sub> HA-Ox <sub>3.00</sub> (100 kDa) vs. HA-ADH <sub>1.00</sub> HA-Ox <sub>3.00</sub> (100 kDa) | ns | 0.5666  |
| HA-ADH <sub>1.67</sub> HA-Ox <sub>3.00</sub> (100 kDa) vs. HA-ADH <sub>1.00</sub> HA-Ox <sub>1.67</sub> (100 kDa) | ns | 0.9997  |
| HA-ADH <sub>1.67</sub> HA-Ox <sub>3.00</sub> (100 kDa) vs. HA-ADH <sub>1.00</sub> HA-Ox <sub>1.00</sub> (100 kDa) | ns | >0.9999 |
| HA-ADH <sub>1.00</sub> HA-Ox <sub>3.00</sub> (100 kDa) vs. HA-ADH <sub>1.00</sub> HA-Ox <sub>1.67</sub> (100 kDa) | ns | 0.928   |
| HA-ADH <sub>1.00</sub> HA-Ox <sub>3.00</sub> (100 kDa) vs. HA-ADH <sub>1.00</sub> HA-Ox <sub>1.00</sub> (100 kDa) | ns | 0.6496  |
| HA-ADH <sub>1.00</sub> HA-Ox <sub>1.67</sub> (100 kDa) vs. HA-ADH <sub>1.00</sub> HA-Ox <sub>1.00</sub> (100 kDa) | ns | 0.9998  |
| <b>Day 21</b>                                                                                                     |    |         |
| HA-ADH <sub>3.00</sub> HA-Ox <sub>3.00</sub> (40 kDa) vs. HA-ADH <sub>3.00</sub> HA-Ox <sub>1.00</sub> (40 kDa)   | ns | 0.2215  |
| HA-ADH <sub>3.00</sub> HA-Ox <sub>3.00</sub> (40 kDa) vs. HA-ADH <sub>2.00</sub> HA-Ox <sub>2.00</sub> (40 kDa)   | ns | >0.9999 |
| HA-ADH <sub>3.00</sub> HA-Ox <sub>3.00</sub> (40 kDa) vs. HA-ADH <sub>1.67</sub> HA-Ox <sub>1.00</sub> (40 kDa)   | ns | 0.8054  |
| HA-ADH <sub>3.00</sub> HA-Ox <sub>3.00</sub> (40 kDa) vs. HA-ADH <sub>1.00</sub> HA-Ox <sub>3.00</sub> (40 kDa)   | ns | 0.0537  |
| HA-ADH <sub>3.00</sub> HA-Ox <sub>3.00</sub> (40 kDa) vs. HA-ADH <sub>1.00</sub> HA-Ox <sub>1.00</sub> (40 kDa)   | ns | 0.052   |
| HA-ADH <sub>3.00</sub> HA-Ox <sub>3.00</sub> (40 kDa) vs. HA-ADH <sub>3.00</sub> HA-Ox <sub>3.00</sub> (100 kDa)  | ns | 0.2209  |
| HA-ADH <sub>3.00</sub> HA-Ox <sub>3.00</sub> (40 kDa) vs. HA-ADH <sub>3.00</sub> HA-Ox <sub>2.33</sub> (100 kDa)  | ns | 0.4186  |
| HA-ADH <sub>3.00</sub> HA-Ox <sub>3.00</sub> (40 kDa) vs. HA-ADH <sub>3.00</sub> HA-Ox <sub>1.00</sub> (100 kDa)  | ns | 0.8093  |
| HA-ADH <sub>3.00</sub> HA-Ox <sub>3.00</sub> (40 kDa) vs. HA-ADH <sub>2.33</sub> HA-Ox <sub>1.00</sub> (100 kDa)  | ns | 0.5724  |
| HA-ADH <sub>3.00</sub> HA-Ox <sub>3.00</sub> (40 kDa) vs. HA-ADH <sub>2.00</sub> HA-Ox <sub>2.00</sub> (100 kDa)  | ns | 0.3462  |
| HA-ADH <sub>3.00</sub> HA-Ox <sub>3.00</sub> (40 kDa) vs. HA-ADH <sub>1.67</sub> HA-Ox <sub>3.00</sub> (100 kDa)  | ns | 0.6414  |
| HA-ADH <sub>3.00</sub> HA-Ox <sub>3.00</sub> (40 kDa) vs. HA-ADH <sub>1.00</sub> HA-Ox <sub>3.00</sub> (100 kDa)  | *  | 0.05    |
| HA-ADH <sub>3.00</sub> HA-Ox <sub>3.00</sub> (40 kDa) vs. HA-ADH <sub>1.00</sub> HA-Ox <sub>1.67</sub> (100 kDa)  | ns | 0.8314  |
| HA-ADH <sub>3.00</sub> HA-Ox <sub>3.00</sub> (40 kDa) vs. HA-ADH <sub>1.00</sub> HA-Ox <sub>1.00</sub> (100 kDa)  | ns | 0.4346  |
| HA-ADH <sub>3.00</sub> HA-Ox <sub>1.00</sub> (40 kDa) vs. HA-ADH <sub>2.00</sub> HA-Ox <sub>2.00</sub> (40 kDa)   | ns | 0.2288  |
| HA-ADH <sub>3.00</sub> HA-Ox <sub>1.00</sub> (40 kDa) vs. HA-ADH <sub>1.67</sub> HA-Ox <sub>1.00</sub> (40 kDa)   | ns | 0.4165  |
| HA-ADH <sub>3.00</sub> HA-Ox <sub>1.00</sub> (40 kDa) vs. HA-ADH <sub>1.00</sub> HA-Ox <sub>3.00</sub> (40 kDa)   | ns | 0.0523  |
| HA-ADH <sub>3.00</sub> HA-Ox <sub>1.00</sub> (40 kDa) vs. HA-ADH <sub>1.00</sub> HA-Ox <sub>1.00</sub> (40 kDa)   | ns | 0.0517  |
| HA-ADH <sub>3.00</sub> HA-Ox <sub>1.00</sub> (40 kDa) vs. HA-ADH <sub>3.00</sub> HA-Ox <sub>3.00</sub> (100 kDa)  | ns | 0.0994  |
| HA-ADH <sub>3.00</sub> HA-Ox <sub>1.00</sub> (40 kDa) vs. HA-ADH <sub>3.00</sub> HA-Ox <sub>2.33</sub> (100 kDa)  | ns | 0.0962  |
| HA-ADH <sub>3.00</sub> HA-Ox <sub>1.00</sub> (40 kDa) vs. HA-ADH <sub>3.00</sub> HA-Ox <sub>1.00</sub> (100 kDa)  | ns | 0.133   |
| HA-ADH <sub>3.00</sub> HA-Ox <sub>1.00</sub> (40 kDa) vs. HA-ADH <sub>2.33</sub> HA-Ox <sub>1.00</sub> (100 kDa)  | ns | 0.132   |
| HA-ADH <sub>3.00</sub> HA-Ox <sub>1.00</sub> (40 kDa) vs. HA-ADH <sub>2.00</sub> HA-Ox <sub>2.00</sub> (100 kDa)  | ns | 0.0968  |

|                                                                                                                  |    |         |
|------------------------------------------------------------------------------------------------------------------|----|---------|
| HA-ADH <sub>3.00</sub> HA-Ox <sub>1.00</sub> (40 kDa) vs. HA-ADH <sub>1.67</sub> HA-Ox <sub>3.00</sub> (100 kDa) | ns | 0.1098  |
| HA-ADH <sub>3.00</sub> HA-Ox <sub>1.00</sub> (40 kDa) vs. HA-ADH <sub>1.00</sub> HA-Ox <sub>3.00</sub> (100 kDa) | *  | 0.0495  |
| HA-ADH <sub>3.00</sub> HA-Ox <sub>1.00</sub> (40 kDa) vs. HA-ADH <sub>1.00</sub> HA-Ox <sub>1.67</sub> (100 kDa) | ns | 0.1034  |
| HA-ADH <sub>3.00</sub> HA-Ox <sub>1.00</sub> (40 kDa) vs. HA-ADH <sub>1.00</sub> HA-Ox <sub>1.00</sub> (100 kDa) | ns | 0.0965  |
| HA-ADH <sub>2.00</sub> HA-Ox <sub>2.00</sub> (40 kDa) vs. HA-ADH <sub>1.67</sub> HA-Ox <sub>1.00</sub> (40 kDa)  | ns | 0.5479  |
| HA-ADH <sub>2.00</sub> HA-Ox <sub>2.00</sub> (40 kDa) vs. HA-ADH <sub>1.00</sub> HA-Ox <sub>3.00</sub> (40 kDa)  | *  | 0.0148  |
| HA-ADH <sub>2.00</sub> HA-Ox <sub>2.00</sub> (40 kDa) vs. HA-ADH <sub>1.00</sub> HA-Ox <sub>1.00</sub> (40 kDa)  | *  | 0.013   |
| HA-ADH <sub>2.00</sub> HA-Ox <sub>2.00</sub> (40 kDa) vs. HA-ADH <sub>3.00</sub> HA-Ox <sub>3.00</sub> (100 kDa) | *  | 0.0415  |
| HA-ADH <sub>2.00</sub> HA-Ox <sub>2.00</sub> (40 kDa) vs. HA-ADH <sub>3.00</sub> HA-Ox <sub>2.33</sub> (100 kDa) | ns | 0.2038  |
| HA-ADH <sub>2.00</sub> HA-Ox <sub>2.00</sub> (40 kDa) vs. HA-ADH <sub>3.00</sub> HA-Ox <sub>1.00</sub> (100 kDa) | ns | 0.5384  |
| HA-ADH <sub>2.00</sub> HA-Ox <sub>2.00</sub> (40 kDa) vs. HA-ADH <sub>2.33</sub> HA-Ox <sub>1.00</sub> (100 kDa) | ns | 0.2089  |
| HA-ADH <sub>2.00</sub> HA-Ox <sub>2.00</sub> (40 kDa) vs. HA-ADH <sub>2.00</sub> HA-Ox <sub>2.00</sub> (100 kDa) | ns | 0.1285  |
| HA-ADH <sub>2.00</sub> HA-Ox <sub>2.00</sub> (40 kDa) vs. HA-ADH <sub>1.67</sub> HA-Ox <sub>3.00</sub> (100 kDa) | ns | 0.397   |
| HA-ADH <sub>2.00</sub> HA-Ox <sub>2.00</sub> (40 kDa) vs. HA-ADH <sub>1.00</sub> HA-Ox <sub>3.00</sub> (100 kDa) | ** | 0.0085  |
| HA-ADH <sub>2.00</sub> HA-Ox <sub>2.00</sub> (40 kDa) vs. HA-ADH <sub>1.00</sub> HA-Ox <sub>1.67</sub> (100 kDa) | ns | 0.7396  |
| HA-ADH <sub>2.00</sub> HA-Ox <sub>2.00</sub> (40 kDa) vs. HA-ADH <sub>1.00</sub> HA-Ox <sub>1.00</sub> (100 kDa) | ns | 0.2194  |
| HA-ADH <sub>1.67</sub> HA-Ox <sub>1.00</sub> (40 kDa) vs. HA-ADH <sub>1.00</sub> HA-Ox <sub>3.00</sub> (40 kDa)  | *  | 0.0173  |
| HA-ADH <sub>1.67</sub> HA-Ox <sub>1.00</sub> (40 kDa) vs. HA-ADH <sub>1.00</sub> HA-Ox <sub>1.00</sub> (40 kDa)  | *  | 0.0161  |
| HA-ADH <sub>1.67</sub> HA-Ox <sub>1.00</sub> (40 kDa) vs. HA-ADH <sub>3.00</sub> HA-Ox <sub>3.00</sub> (100 kDa) | *  | 0.0362  |
| HA-ADH <sub>1.67</sub> HA-Ox <sub>1.00</sub> (40 kDa) vs. HA-ADH <sub>3.00</sub> HA-Ox <sub>2.33</sub> (100 kDa) | ns | 0.0602  |
| HA-ADH <sub>1.67</sub> HA-Ox <sub>1.00</sub> (40 kDa) vs. HA-ADH <sub>3.00</sub> HA-Ox <sub>1.00</sub> (100 kDa) | ns | 0.1296  |
| HA-ADH <sub>1.67</sub> HA-Ox <sub>1.00</sub> (40 kDa) vs. HA-ADH <sub>2.33</sub> HA-Ox <sub>1.00</sub> (100 kDa) | ns | 0.0746  |
| HA-ADH <sub>1.67</sub> HA-Ox <sub>1.00</sub> (40 kDa) vs. HA-ADH <sub>2.00</sub> HA-Ox <sub>2.00</sub> (100 kDa) | *  | 0.0433  |
| HA-ADH <sub>1.67</sub> HA-Ox <sub>1.00</sub> (40 kDa) vs. HA-ADH <sub>1.67</sub> HA-Ox <sub>3.00</sub> (100 kDa) | ns | 0.1067  |
| HA-ADH <sub>1.67</sub> HA-Ox <sub>1.00</sub> (40 kDa) vs. HA-ADH <sub>1.00</sub> HA-Ox <sub>3.00</sub> (100 kDa) | ** | 0.0062  |
| HA-ADH <sub>1.67</sub> HA-Ox <sub>1.00</sub> (40 kDa) vs. HA-ADH <sub>1.00</sub> HA-Ox <sub>1.67</sub> (100 kDa) | ns | 0.3496  |
| HA-ADH <sub>1.67</sub> HA-Ox <sub>1.00</sub> (40 kDa) vs. HA-ADH <sub>1.00</sub> HA-Ox <sub>1.00</sub> (100 kDa) | ns | 0.064   |
| HA-ADH <sub>1.00</sub> HA-Ox <sub>3.00</sub> (40 kDa) vs. HA-ADH <sub>1.00</sub> HA-Ox <sub>1.00</sub> (40 kDa)  | ns | >0.9999 |
| HA-ADH <sub>1.00</sub> HA-Ox <sub>3.00</sub> (40 kDa) vs. HA-ADH <sub>3.00</sub> HA-Ox <sub>3.00</sub> (100 kDa) | *  | 0.0145  |
| HA-ADH <sub>1.00</sub> HA-Ox <sub>3.00</sub> (40 kDa) vs. HA-ADH <sub>3.00</sub> HA-Ox <sub>2.33</sub> (100 kDa) | ns | 0.065   |
| HA-ADH <sub>1.00</sub> HA-Ox <sub>3.00</sub> (40 kDa) vs. HA-ADH <sub>3.00</sub> HA-Ox <sub>1.00</sub> (100 kDa) | *  | 0.0391  |
| HA-ADH <sub>1.00</sub> HA-Ox <sub>3.00</sub> (40 kDa) vs. HA-ADH <sub>2.33</sub> HA-Ox <sub>1.00</sub> (100 kDa) | *  | 0.0171  |
| HA-ADH <sub>1.00</sub> HA-Ox <sub>3.00</sub> (40 kDa) vs. HA-ADH <sub>2.00</sub> HA-Ox <sub>2.00</sub> (100 kDa) | ns | 0.0531  |
| HA-ADH <sub>1.00</sub> HA-Ox <sub>3.00</sub> (40 kDa) vs. HA-ADH <sub>1.67</sub> HA-Ox <sub>3.00</sub> (100 kDa) | ns | 0.0611  |
| HA-ADH <sub>1.00</sub> HA-Ox <sub>3.00</sub> (40 kDa) vs. HA-ADH <sub>1.00</sub> HA-Ox <sub>3.00</sub> (100 kDa) | ns | 0.2976  |
| HA-ADH <sub>1.00</sub> HA-Ox <sub>3.00</sub> (40 kDa) vs. HA-ADH <sub>1.00</sub> HA-Ox <sub>1.67</sub> (100 kDa) | ns | 0.2014  |
| HA-ADH <sub>1.00</sub> HA-Ox <sub>3.00</sub> (40 kDa) vs. HA-ADH <sub>1.00</sub> HA-Ox <sub>1.00</sub> (100 kDa) | ns | 0.0664  |
| HA-ADH <sub>1.00</sub> HA-Ox <sub>1.00</sub> (40 kDa) vs. HA-ADH <sub>3.00</sub> HA-Ox <sub>3.00</sub> (100 kDa) | *  | 0.0104  |
| HA-ADH <sub>1.00</sub> HA-Ox <sub>1.00</sub> (40 kDa) vs. HA-ADH <sub>3.00</sub> HA-Ox <sub>2.33</sub> (100 kDa) | ns | 0.0618  |

|                                                                                                                   |    |         |
|-------------------------------------------------------------------------------------------------------------------|----|---------|
| HA-ADH <sub>1.00</sub> HA-Ox <sub>1.00</sub> (40 kDa) vs. HA-ADH <sub>3.00</sub> HA-Ox <sub>1.00</sub> (100 kDa)  | *  | 0.0367  |
| HA-ADH <sub>1.00</sub> HA-Ox <sub>1.00</sub> (40 kDa) vs. HA-ADH <sub>2.33</sub> HA-Ox <sub>1.00</sub> (100 kDa)  | *  | 0.0143  |
| HA-ADH <sub>1.00</sub> HA-Ox <sub>1.00</sub> (40 kDa) vs. HA-ADH <sub>2.00</sub> HA-Ox <sub>2.00</sub> (100 kDa)  | *  | 0.0497  |
| HA-ADH <sub>1.00</sub> HA-Ox <sub>1.00</sub> (40 kDa) vs. HA-ADH <sub>1.67</sub> HA-Ox <sub>3.00</sub> (100 kDa)  | ns | 0.0584  |
| HA-ADH <sub>1.00</sub> HA-Ox <sub>1.00</sub> (40 kDa) vs. HA-ADH <sub>1.00</sub> HA-Ox <sub>3.00</sub> (100 kDa)  | ns | 0.2844  |
| HA-ADH <sub>1.00</sub> HA-Ox <sub>1.00</sub> (40 kDa) vs. HA-ADH <sub>1.00</sub> HA-Ox <sub>1.67</sub> (100 kDa)  | ns | 0.1981  |
| HA-ADH <sub>1.00</sub> HA-Ox <sub>1.00</sub> (40 kDa) vs. HA-ADH <sub>1.00</sub> HA-Ox <sub>1.00</sub> (100 kDa)  | ns | 0.0633  |
| HA-ADH <sub>3.00</sub> HA-Ox <sub>3.00</sub> (100 kDa) vs. HA-ADH <sub>3.00</sub> HA-Ox <sub>2.33</sub> (100 kDa) | ns | 0.9289  |
| HA-ADH <sub>3.00</sub> HA-Ox <sub>3.00</sub> (100 kDa) vs. HA-ADH <sub>3.00</sub> HA-Ox <sub>1.00</sub> (100 kDa) | ns | 0.3451  |
| HA-ADH <sub>3.00</sub> HA-Ox <sub>3.00</sub> (100 kDa) vs. HA-ADH <sub>2.33</sub> HA-Ox <sub>1.00</sub> (100 kDa) | ns | 0.2547  |
| HA-ADH <sub>3.00</sub> HA-Ox <sub>3.00</sub> (100 kDa) vs. HA-ADH <sub>2.00</sub> HA-Ox <sub>2.00</sub> (100 kDa) | ns | 0.9641  |
| HA-ADH <sub>3.00</sub> HA-Ox <sub>3.00</sub> (100 kDa) vs. HA-ADH <sub>1.67</sub> HA-Ox <sub>3.00</sub> (100 kDa) | ns | 0.6719  |
| HA-ADH <sub>3.00</sub> HA-Ox <sub>3.00</sub> (100 kDa) vs. HA-ADH <sub>1.00</sub> HA-Ox <sub>3.00</sub> (100 kDa) | ns | 0.1406  |
| HA-ADH <sub>3.00</sub> HA-Ox <sub>3.00</sub> (100 kDa) vs. HA-ADH <sub>1.00</sub> HA-Ox <sub>1.67</sub> (100 kDa) | ns | 0.9736  |
| HA-ADH <sub>3.00</sub> HA-Ox <sub>3.00</sub> (100 kDa) vs. HA-ADH <sub>1.00</sub> HA-Ox <sub>1.00</sub> (100 kDa) | ns | 0.9185  |
| HA-ADH <sub>3.00</sub> HA-Ox <sub>2.33</sub> (100 kDa) vs. HA-ADH <sub>3.00</sub> HA-Ox <sub>1.00</sub> (100 kDa) | ns | 0.9381  |
| HA-ADH <sub>3.00</sub> HA-Ox <sub>2.33</sub> (100 kDa) vs. HA-ADH <sub>2.33</sub> HA-Ox <sub>1.00</sub> (100 kDa) | ns | 0.9901  |
| HA-ADH <sub>3.00</sub> HA-Ox <sub>2.33</sub> (100 kDa) vs. HA-ADH <sub>2.00</sub> HA-Ox <sub>2.00</sub> (100 kDa) | ns | >0.9999 |
| HA-ADH <sub>3.00</sub> HA-Ox <sub>2.33</sub> (100 kDa) vs. HA-ADH <sub>1.67</sub> HA-Ox <sub>3.00</sub> (100 kDa) | ns | 0.9997  |
| HA-ADH <sub>3.00</sub> HA-Ox <sub>2.33</sub> (100 kDa) vs. HA-ADH <sub>1.00</sub> HA-Ox <sub>3.00</sub> (100 kDa) | ns | 0.1191  |
| HA-ADH <sub>3.00</sub> HA-Ox <sub>2.33</sub> (100 kDa) vs. HA-ADH <sub>1.00</sub> HA-Ox <sub>1.67</sub> (100 kDa) | ns | >0.9999 |
| HA-ADH <sub>3.00</sub> HA-Ox <sub>2.33</sub> (100 kDa) vs. HA-ADH <sub>1.00</sub> HA-Ox <sub>1.00</sub> (100 kDa) | ns | >0.9999 |
| HA-ADH <sub>3.00</sub> HA-Ox <sub>1.00</sub> (100 kDa) vs. HA-ADH <sub>2.33</sub> HA-Ox <sub>1.00</sub> (100 kDa) | ns | 0.9998  |
| HA-ADH <sub>3.00</sub> HA-Ox <sub>1.00</sub> (100 kDa) vs. HA-ADH <sub>2.00</sub> HA-Ox <sub>2.00</sub> (100 kDa) | ns | 0.8315  |
| HA-ADH <sub>3.00</sub> HA-Ox <sub>1.00</sub> (100 kDa) vs. HA-ADH <sub>1.67</sub> HA-Ox <sub>3.00</sub> (100 kDa) | ns | 0.9999  |
| HA-ADH <sub>3.00</sub> HA-Ox <sub>1.00</sub> (100 kDa) vs. HA-ADH <sub>1.00</sub> HA-Ox <sub>3.00</sub> (100 kDa) | *  | 0.0408  |
| HA-ADH <sub>3.00</sub> HA-Ox <sub>1.00</sub> (100 kDa) vs. HA-ADH <sub>1.00</sub> HA-Ox <sub>1.67</sub> (100 kDa) | ns | >0.9999 |
| HA-ADH <sub>3.00</sub> HA-Ox <sub>1.00</sub> (100 kDa) vs. HA-ADH <sub>1.00</sub> HA-Ox <sub>1.00</sub> (100 kDa) | ns | 0.9517  |
| HA-ADH <sub>2.33</sub> HA-Ox <sub>1.00</sub> (100 kDa) vs. HA-ADH <sub>2.00</sub> HA-Ox <sub>2.00</sub> (100 kDa) | ns | 0.9314  |
| HA-ADH <sub>2.33</sub> HA-Ox <sub>1.00</sub> (100 kDa) vs. HA-ADH <sub>1.67</sub> HA-Ox <sub>3.00</sub> (100 kDa) | ns | >0.9999 |
| HA-ADH <sub>2.33</sub> HA-Ox <sub>1.00</sub> (100 kDa) vs. HA-ADH <sub>1.00</sub> HA-Ox <sub>3.00</sub> (100 kDa) | *  | 0.0341  |
| HA-ADH <sub>2.33</sub> HA-Ox <sub>1.00</sub> (100 kDa) vs. HA-ADH <sub>1.00</sub> HA-Ox <sub>1.67</sub> (100 kDa) | ns | >0.9999 |
| HA-ADH <sub>2.33</sub> HA-Ox <sub>1.00</sub> (100 kDa) vs. HA-ADH <sub>1.00</sub> HA-Ox <sub>1.00</sub> (100 kDa) | ns | 0.9941  |
| HA-ADH <sub>2.00</sub> HA-Ox <sub>2.00</sub> (100 kDa) vs. HA-ADH <sub>1.67</sub> HA-Ox <sub>3.00</sub> (100 kDa) | ns | 0.9946  |
| HA-ADH <sub>2.00</sub> HA-Ox <sub>2.00</sub> (100 kDa) vs. HA-ADH <sub>1.00</sub> HA-Ox <sub>3.00</sub> (100 kDa) | ns | 0.1065  |
| HA-ADH <sub>2.00</sub> HA-Ox <sub>2.00</sub> (100 kDa) vs. HA-ADH <sub>1.00</sub> HA-Ox <sub>1.67</sub> (100 kDa) | ns | >0.9999 |
| HA-ADH <sub>2.00</sub> HA-Ox <sub>2.00</sub> (100 kDa) vs. HA-ADH <sub>1.00</sub> HA-Ox <sub>1.00</sub> (100 kDa) | ns | >0.9999 |
| HA-ADH <sub>1.67</sub> HA-Ox <sub>3.00</sub> (100 kDa) vs. HA-ADH <sub>1.00</sub> HA-Ox <sub>3.00</sub> (100 kDa) | ns | 0.0881  |
| HA-ADH <sub>1.67</sub> HA-Ox <sub>3.00</sub> (100 kDa) vs. HA-ADH <sub>1.00</sub> HA-Ox <sub>1.67</sub> (100 kDa) | ns | >0.9999 |

|                                                                                                                   |    |         |
|-------------------------------------------------------------------------------------------------------------------|----|---------|
| HA-ADH <sub>1.67</sub> HA-Ox <sub>3.00</sub> (100 kDa) vs. HA-ADH <sub>1.00</sub> HA-Ox <sub>1.00</sub> (100 kDa) | ns | 0.9999  |
| HA-ADH <sub>1.00</sub> HA-Ox <sub>3.00</sub> (100 kDa) vs. HA-ADH <sub>1.00</sub> HA-Ox <sub>1.67</sub> (100 kDa) | ns | 0.3893  |
| HA-ADH <sub>1.00</sub> HA-Ox <sub>3.00</sub> (100 kDa) vs. HA-ADH <sub>1.00</sub> HA-Ox <sub>1.00</sub> (100 kDa) | ns | 0.1199  |
| HA-ADH <sub>1.00</sub> HA-Ox <sub>1.67</sub> (100 kDa) vs. HA-ADH <sub>1.00</sub> HA-Ox <sub>1.00</sub> (100 kDa) | ns | >0.9999 |
| <b>Day 28</b>                                                                                                     |    |         |
| HA-ADH <sub>3.00</sub> HA-Ox <sub>3.00</sub> (40 kDa) vs. HA-ADH <sub>3.00</sub> HA-Ox <sub>1.00</sub> (40 kDa)   | ns | 0.0887  |
| HA-ADH <sub>3.00</sub> HA-Ox <sub>3.00</sub> (40 kDa) vs. HA-ADH <sub>2.00</sub> HA-Ox <sub>2.00</sub> (40 kDa)   | ns | 0.8973  |
| HA-ADH <sub>3.00</sub> HA-Ox <sub>3.00</sub> (40 kDa) vs. HA-ADH <sub>1.67</sub> HA-Ox <sub>1.00</sub> (40 kDa)   | ns | 0.4655  |
| HA-ADH <sub>3.00</sub> HA-Ox <sub>3.00</sub> (40 kDa) vs. HA-ADH <sub>1.00</sub> HA-Ox <sub>3.00</sub> (40 kDa)   | ** | 0.0025  |
| HA-ADH <sub>3.00</sub> HA-Ox <sub>3.00</sub> (40 kDa) vs. HA-ADH <sub>1.00</sub> HA-Ox <sub>1.00</sub> (40 kDa)   | ** | 0.0015  |
| HA-ADH <sub>3.00</sub> HA-Ox <sub>3.00</sub> (40 kDa) vs. HA-ADH <sub>3.00</sub> HA-Ox <sub>3.00</sub> (100 kDa)  | *  | 0.0108  |
| HA-ADH <sub>3.00</sub> HA-Ox <sub>3.00</sub> (40 kDa) vs. HA-ADH <sub>3.00</sub> HA-Ox <sub>2.33</sub> (100 kDa)  | *  | 0.013   |
| HA-ADH <sub>3.00</sub> HA-Ox <sub>3.00</sub> (40 kDa) vs. HA-ADH <sub>3.00</sub> HA-Ox <sub>1.00</sub> (100 kDa)  | ns | 0.9982  |
| HA-ADH <sub>3.00</sub> HA-Ox <sub>3.00</sub> (40 kDa) vs. HA-ADH <sub>2.33</sub> HA-Ox <sub>1.00</sub> (100 kDa)  | ns | 0.2129  |
| HA-ADH <sub>3.00</sub> HA-Ox <sub>3.00</sub> (40 kDa) vs. HA-ADH <sub>2.00</sub> HA-Ox <sub>2.00</sub> (100 kDa)  | ns | 0.2207  |
| HA-ADH <sub>3.00</sub> HA-Ox <sub>3.00</sub> (40 kDa) vs. HA-ADH <sub>1.67</sub> HA-Ox <sub>3.00</sub> (100 kDa)  | ** | 0.0032  |
| HA-ADH <sub>3.00</sub> HA-Ox <sub>3.00</sub> (40 kDa) vs. HA-ADH <sub>1.00</sub> HA-Ox <sub>3.00</sub> (100 kDa)  | *  | 0.0127  |
| HA-ADH <sub>3.00</sub> HA-Ox <sub>3.00</sub> (40 kDa) vs. HA-ADH <sub>1.00</sub> HA-Ox <sub>1.67</sub> (100 kDa)  | ns | 0.1384  |
| HA-ADH <sub>3.00</sub> HA-Ox <sub>3.00</sub> (40 kDa) vs. HA-ADH <sub>1.00</sub> HA-Ox <sub>1.00</sub> (100 kDa)  | ns | 0.2095  |
| HA-ADH <sub>3.00</sub> HA-Ox <sub>1.00</sub> (40 kDa) vs. HA-ADH <sub>2.00</sub> HA-Ox <sub>2.00</sub> (40 kDa)   | ns | 0.2687  |
| HA-ADH <sub>3.00</sub> HA-Ox <sub>1.00</sub> (40 kDa) vs. HA-ADH <sub>1.67</sub> HA-Ox <sub>1.00</sub> (40 kDa)   | ns | 0.2282  |
| HA-ADH <sub>3.00</sub> HA-Ox <sub>1.00</sub> (40 kDa) vs. HA-ADH <sub>1.00</sub> HA-Ox <sub>3.00</sub> (40 kDa)   | *  | 0.018   |
| HA-ADH <sub>3.00</sub> HA-Ox <sub>1.00</sub> (40 kDa) vs. HA-ADH <sub>1.00</sub> HA-Ox <sub>1.00</sub> (40 kDa)   | *  | 0.0173  |
| HA-ADH <sub>3.00</sub> HA-Ox <sub>1.00</sub> (40 kDa) vs. HA-ADH <sub>3.00</sub> HA-Ox <sub>3.00</sub> (100 kDa)  | *  | 0.0224  |
| HA-ADH <sub>3.00</sub> HA-Ox <sub>1.00</sub> (40 kDa) vs. HA-ADH <sub>3.00</sub> HA-Ox <sub>2.33</sub> (100 kDa)  | *  | 0.0442  |
| HA-ADH <sub>3.00</sub> HA-Ox <sub>1.00</sub> (40 kDa) vs. HA-ADH <sub>3.00</sub> HA-Ox <sub>1.00</sub> (100 kDa)  | ns | 0.0557  |
| HA-ADH <sub>3.00</sub> HA-Ox <sub>1.00</sub> (40 kDa) vs. HA-ADH <sub>2.33</sub> HA-Ox <sub>1.00</sub> (100 kDa)  | *  | 0.0148  |
| HA-ADH <sub>3.00</sub> HA-Ox <sub>1.00</sub> (40 kDa) vs. HA-ADH <sub>2.00</sub> HA-Ox <sub>2.00</sub> (100 kDa)  | *  | 0.0164  |
| HA-ADH <sub>3.00</sub> HA-Ox <sub>1.00</sub> (40 kDa) vs. HA-ADH <sub>1.67</sub> HA-Ox <sub>3.00</sub> (100 kDa)  | *  | 0.025   |
| HA-ADH <sub>3.00</sub> HA-Ox <sub>1.00</sub> (40 kDa) vs. HA-ADH <sub>1.00</sub> HA-Ox <sub>3.00</sub> (100 kDa)  | ** | 0.0064  |
| HA-ADH <sub>3.00</sub> HA-Ox <sub>1.00</sub> (40 kDa) vs. HA-ADH <sub>1.00</sub> HA-Ox <sub>1.67</sub> (100 kDa)  | ** | 0.0096  |
| HA-ADH <sub>3.00</sub> HA-Ox <sub>1.00</sub> (40 kDa) vs. HA-ADH <sub>1.00</sub> HA-Ox <sub>1.00</sub> (100 kDa)  | *  | 0.0133  |
| HA-ADH <sub>2.00</sub> HA-Ox <sub>2.00</sub> (40 kDa) vs. HA-ADH <sub>1.67</sub> HA-Ox <sub>1.00</sub> (40 kDa)   | ns | >0.9999 |
| HA-ADH <sub>2.00</sub> HA-Ox <sub>2.00</sub> (40 kDa) vs. HA-ADH <sub>1.00</sub> HA-Ox <sub>3.00</sub> (40 kDa)   | ns | 0.061   |
| HA-ADH <sub>2.00</sub> HA-Ox <sub>2.00</sub> (40 kDa) vs. HA-ADH <sub>1.00</sub> HA-Ox <sub>1.00</sub> (40 kDa)   | ns | 0.0601  |
| HA-ADH <sub>2.00</sub> HA-Ox <sub>2.00</sub> (40 kDa) vs. HA-ADH <sub>3.00</sub> HA-Ox <sub>3.00</sub> (100 kDa)  | ns | 0.1631  |
| HA-ADH <sub>2.00</sub> HA-Ox <sub>2.00</sub> (40 kDa) vs. HA-ADH <sub>3.00</sub> HA-Ox <sub>2.33</sub> (100 kDa)  | ns | 0.2372  |
| HA-ADH <sub>2.00</sub> HA-Ox <sub>2.00</sub> (40 kDa) vs. HA-ADH <sub>3.00</sub> HA-Ox <sub>1.00</sub> (100 kDa)  | ns | 0.8603  |
| HA-ADH <sub>2.00</sub> HA-Ox <sub>2.00</sub> (40 kDa) vs. HA-ADH <sub>2.33</sub> HA-Ox <sub>1.00</sub> (100 kDa)  | ns | 0.224   |

|                                                                                                                   |      |         |
|-------------------------------------------------------------------------------------------------------------------|------|---------|
| HA-ADH <sub>2.00</sub> HA-Ox <sub>2.00</sub> (40 kDa) vs. HA-ADH <sub>2.00</sub> HA-Ox <sub>2.00</sub> (100 kDa)  | ns   | 0.2533  |
| HA-ADH <sub>2.00</sub> HA-Ox <sub>2.00</sub> (40 kDa) vs. HA-ADH <sub>1.67</sub> HA-Ox <sub>3.00</sub> (100 kDa)  | ns   | 0.1493  |
| HA-ADH <sub>2.00</sub> HA-Ox <sub>2.00</sub> (40 kDa) vs. HA-ADH <sub>1.00</sub> HA-Ox <sub>3.00</sub> (100 kDa)  | ns   | 0.052   |
| HA-ADH <sub>2.00</sub> HA-Ox <sub>2.00</sub> (40 kDa) vs. HA-ADH <sub>1.00</sub> HA-Ox <sub>1.67</sub> (100 kDa)  | ns   | 0.0979  |
| HA-ADH <sub>2.00</sub> HA-Ox <sub>2.00</sub> (40 kDa) vs. HA-ADH <sub>1.00</sub> HA-Ox <sub>1.00</sub> (100 kDa)  | ns   | 0.1733  |
| HA-ADH <sub>1.67</sub> HA-Ox <sub>1.00</sub> (40 kDa) vs. HA-ADH <sub>1.00</sub> HA-Ox <sub>3.00</sub> (40 kDa)   | *    | 0.0253  |
| HA-ADH <sub>1.67</sub> HA-Ox <sub>1.00</sub> (40 kDa) vs. HA-ADH <sub>1.00</sub> HA-Ox <sub>1.00</sub> (40 kDa)   | *    | 0.0242  |
| HA-ADH <sub>1.67</sub> HA-Ox <sub>1.00</sub> (40 kDa) vs. HA-ADH <sub>3.00</sub> HA-Ox <sub>3.00</sub> (100 kDa)  | *    | 0.0452  |
| HA-ADH <sub>1.67</sub> HA-Ox <sub>1.00</sub> (40 kDa) vs. HA-ADH <sub>3.00</sub> HA-Ox <sub>2.33</sub> (100 kDa)  | ns   | 0.0936  |
| HA-ADH <sub>1.67</sub> HA-Ox <sub>1.00</sub> (40 kDa) vs. HA-ADH <sub>3.00</sub> HA-Ox <sub>1.00</sub> (100 kDa)  | ns   | 0.5128  |
| HA-ADH <sub>1.67</sub> HA-Ox <sub>1.00</sub> (40 kDa) vs. HA-ADH <sub>2.33</sub> HA-Ox <sub>1.00</sub> (100 kDa)  | ns   | 0.0679  |
| HA-ADH <sub>1.67</sub> HA-Ox <sub>1.00</sub> (40 kDa) vs. HA-ADH <sub>2.00</sub> HA-Ox <sub>2.00</sub> (100 kDa)  | ns   | 0.0741  |
| HA-ADH <sub>1.67</sub> HA-Ox <sub>1.00</sub> (40 kDa) vs. HA-ADH <sub>1.67</sub> HA-Ox <sub>3.00</sub> (100 kDa)  | *    | 0.0459  |
| HA-ADH <sub>1.67</sub> HA-Ox <sub>1.00</sub> (40 kDa) vs. HA-ADH <sub>1.00</sub> HA-Ox <sub>3.00</sub> (100 kDa)  | **   | 0.0095  |
| HA-ADH <sub>1.67</sub> HA-Ox <sub>1.00</sub> (40 kDa) vs. HA-ADH <sub>1.00</sub> HA-Ox <sub>1.67</sub> (100 kDa)  | *    | 0.0396  |
| HA-ADH <sub>1.67</sub> HA-Ox <sub>1.00</sub> (40 kDa) vs. HA-ADH <sub>1.00</sub> HA-Ox <sub>1.00</sub> (100 kDa)  | ns   | 0.0633  |
| HA-ADH <sub>1.00</sub> HA-Ox <sub>3.00</sub> (40 kDa) vs. HA-ADH <sub>1.00</sub> HA-Ox <sub>1.00</sub> (40 kDa)   | ns   | >0.9999 |
| HA-ADH <sub>1.00</sub> HA-Ox <sub>3.00</sub> (40 kDa) vs. HA-ADH <sub>3.00</sub> HA-Ox <sub>3.00</sub> (100 kDa)  | *    | 0.0301  |
| HA-ADH <sub>1.00</sub> HA-Ox <sub>3.00</sub> (40 kDa) vs. HA-ADH <sub>3.00</sub> HA-Ox <sub>2.33</sub> (100 kDa)  | **** | <0.0001 |
| HA-ADH <sub>1.00</sub> HA-Ox <sub>3.00</sub> (40 kDa) vs. HA-ADH <sub>3.00</sub> HA-Ox <sub>1.00</sub> (100 kDa)  | ns   | 0.0639  |
| HA-ADH <sub>1.00</sub> HA-Ox <sub>3.00</sub> (40 kDa) vs. HA-ADH <sub>2.33</sub> HA-Ox <sub>1.00</sub> (100 kDa)  | ns   | 0.0914  |
| HA-ADH <sub>1.00</sub> HA-Ox <sub>3.00</sub> (40 kDa) vs. HA-ADH <sub>2.00</sub> HA-Ox <sub>2.00</sub> (100 kDa)  | ns   | 0.0732  |
| HA-ADH <sub>1.00</sub> HA-Ox <sub>3.00</sub> (40 kDa) vs. HA-ADH <sub>1.67</sub> HA-Ox <sub>3.00</sub> (100 kDa)  | *    | 0.0216  |
| HA-ADH <sub>1.00</sub> HA-Ox <sub>3.00</sub> (40 kDa) vs. HA-ADH <sub>1.00</sub> HA-Ox <sub>3.00</sub> (100 kDa)  | ns   | 0.4367  |
| HA-ADH <sub>1.00</sub> HA-Ox <sub>3.00</sub> (40 kDa) vs. HA-ADH <sub>1.00</sub> HA-Ox <sub>1.67</sub> (100 kDa)  | ns   | 0.3021  |
| HA-ADH <sub>1.00</sub> HA-Ox <sub>3.00</sub> (40 kDa) vs. HA-ADH <sub>1.00</sub> HA-Ox <sub>1.00</sub> (100 kDa)  | ns   | 0.1566  |
| HA-ADH <sub>1.00</sub> HA-Ox <sub>1.00</sub> (40 kDa) vs. HA-ADH <sub>3.00</sub> HA-Ox <sub>3.00</sub> (100 kDa)  | *    | 0.0248  |
| HA-ADH <sub>1.00</sub> HA-Ox <sub>1.00</sub> (40 kDa) vs. HA-ADH <sub>3.00</sub> HA-Ox <sub>2.33</sub> (100 kDa)  | **** | <0.0001 |
| HA-ADH <sub>1.00</sub> HA-Ox <sub>1.00</sub> (40 kDa) vs. HA-ADH <sub>3.00</sub> HA-Ox <sub>1.00</sub> (100 kDa)  | ns   | 0.0625  |
| HA-ADH <sub>1.00</sub> HA-Ox <sub>1.00</sub> (40 kDa) vs. HA-ADH <sub>2.33</sub> HA-Ox <sub>1.00</sub> (100 kDa)  | ns   | 0.0891  |
| HA-ADH <sub>1.00</sub> HA-Ox <sub>1.00</sub> (40 kDa) vs. HA-ADH <sub>2.00</sub> HA-Ox <sub>2.00</sub> (100 kDa)  | ns   | 0.0707  |
| HA-ADH <sub>1.00</sub> HA-Ox <sub>1.00</sub> (40 kDa) vs. HA-ADH <sub>1.67</sub> HA-Ox <sub>3.00</sub> (100 kDa)  | *    | 0.0156  |
| HA-ADH <sub>1.00</sub> HA-Ox <sub>1.00</sub> (40 kDa) vs. HA-ADH <sub>1.00</sub> HA-Ox <sub>3.00</sub> (100 kDa)  | ns   | 0.4361  |
| HA-ADH <sub>1.00</sub> HA-Ox <sub>1.00</sub> (40 kDa) vs. HA-ADH <sub>1.00</sub> HA-Ox <sub>1.67</sub> (100 kDa)  | ns   | 0.3009  |
| HA-ADH <sub>1.00</sub> HA-Ox <sub>1.00</sub> (40 kDa) vs. HA-ADH <sub>1.00</sub> HA-Ox <sub>1.00</sub> (100 kDa)  | ns   | 0.1547  |
| HA-ADH <sub>3.00</sub> HA-Ox <sub>3.00</sub> (100 kDa) vs. HA-ADH <sub>3.00</sub> HA-Ox <sub>2.33</sub> (100 kDa) | ns   | 0.6017  |
| HA-ADH <sub>3.00</sub> HA-Ox <sub>3.00</sub> (100 kDa) vs. HA-ADH <sub>3.00</sub> HA-Ox <sub>1.00</sub> (100 kDa) | ns   | 0.2775  |
| HA-ADH <sub>3.00</sub> HA-Ox <sub>3.00</sub> (100 kDa) vs. HA-ADH <sub>2.33</sub> HA-Ox <sub>1.00</sub> (100 kDa) | ns   | 0.9758  |
| HA-ADH <sub>3.00</sub> HA-Ox <sub>3.00</sub> (100 kDa) vs. HA-ADH <sub>2.00</sub> HA-Ox <sub>2.00</sub> (100 kDa) | ns   | 0.8782  |

|                                                                                                                   |    |         |
|-------------------------------------------------------------------------------------------------------------------|----|---------|
| HA-ADH <sub>3.00</sub> HA-Ox <sub>3.00</sub> (100 kDa) vs. HA-ADH <sub>1.67</sub> HA-Ox <sub>3.00</sub> (100 kDa) | ns | 0.9973  |
| HA-ADH <sub>3.00</sub> HA-Ox <sub>3.00</sub> (100 kDa) vs. HA-ADH <sub>1.00</sub> HA-Ox <sub>3.00</sub> (100 kDa) | ns | 0.1094  |
| HA-ADH <sub>3.00</sub> HA-Ox <sub>3.00</sub> (100 kDa) vs. HA-ADH <sub>1.00</sub> HA-Ox <sub>1.67</sub> (100 kDa) | ns | 0.9713  |
| HA-ADH <sub>3.00</sub> HA-Ox <sub>3.00</sub> (100 kDa) vs. HA-ADH <sub>1.00</sub> HA-Ox <sub>1.00</sub> (100 kDa) | ns | >0.9999 |
| HA-ADH <sub>3.00</sub> HA-Ox <sub>2.33</sub> (100 kDa) vs. HA-ADH <sub>3.00</sub> HA-Ox <sub>1.00</sub> (100 kDa) | ns | 0.4403  |
| HA-ADH <sub>3.00</sub> HA-Ox <sub>2.33</sub> (100 kDa) vs. HA-ADH <sub>2.33</sub> HA-Ox <sub>1.00</sub> (100 kDa) | ns | >0.9999 |
| HA-ADH <sub>3.00</sub> HA-Ox <sub>2.33</sub> (100 kDa) vs. HA-ADH <sub>2.00</sub> HA-Ox <sub>2.00</sub> (100 kDa) | ns | >0.9999 |
| HA-ADH <sub>3.00</sub> HA-Ox <sub>2.33</sub> (100 kDa) vs. HA-ADH <sub>1.67</sub> HA-Ox <sub>3.00</sub> (100 kDa) | ns | 0.23    |
| HA-ADH <sub>3.00</sub> HA-Ox <sub>2.33</sub> (100 kDa) vs. HA-ADH <sub>1.00</sub> HA-Ox <sub>3.00</sub> (100 kDa) | ns | 0.0885  |
| HA-ADH <sub>3.00</sub> HA-Ox <sub>2.33</sub> (100 kDa) vs. HA-ADH <sub>1.00</sub> HA-Ox <sub>1.67</sub> (100 kDa) | ns | 0.6834  |
| HA-ADH <sub>3.00</sub> HA-Ox <sub>2.33</sub> (100 kDa) vs. HA-ADH <sub>1.00</sub> HA-Ox <sub>1.00</sub> (100 kDa) | ns | 0.998   |
| HA-ADH <sub>3.00</sub> HA-Ox <sub>1.00</sub> (100 kDa) vs. HA-ADH <sub>2.33</sub> HA-Ox <sub>1.00</sub> (100 kDa) | ns | 0.5763  |
| HA-ADH <sub>3.00</sub> HA-Ox <sub>1.00</sub> (100 kDa) vs. HA-ADH <sub>2.00</sub> HA-Ox <sub>2.00</sub> (100 kDa) | ns | 0.6545  |
| HA-ADH <sub>3.00</sub> HA-Ox <sub>1.00</sub> (100 kDa) vs. HA-ADH <sub>1.67</sub> HA-Ox <sub>3.00</sub> (100 kDa) | ns | 0.2314  |
| HA-ADH <sub>3.00</sub> HA-Ox <sub>1.00</sub> (100 kDa) vs. HA-ADH <sub>1.00</sub> HA-Ox <sub>3.00</sub> (100 kDa) | ns | 0.0562  |
| HA-ADH <sub>3.00</sub> HA-Ox <sub>1.00</sub> (100 kDa) vs. HA-ADH <sub>1.00</sub> HA-Ox <sub>1.67</sub> (100 kDa) | ns | 0.2151  |
| HA-ADH <sub>3.00</sub> HA-Ox <sub>1.00</sub> (100 kDa) vs. HA-ADH <sub>1.00</sub> HA-Ox <sub>1.00</sub> (100 kDa) | ns | 0.4379  |
| HA-ADH <sub>2.33</sub> HA-Ox <sub>1.00</sub> (100 kDa) vs. HA-ADH <sub>2.00</sub> HA-Ox <sub>2.00</sub> (100 kDa) | ns | >0.9999 |
| HA-ADH <sub>2.33</sub> HA-Ox <sub>1.00</sub> (100 kDa) vs. HA-ADH <sub>1.67</sub> HA-Ox <sub>3.00</sub> (100 kDa) | ns | 0.8422  |
| HA-ADH <sub>2.33</sub> HA-Ox <sub>1.00</sub> (100 kDa) vs. HA-ADH <sub>1.00</sub> HA-Ox <sub>3.00</sub> (100 kDa) | ns | 0.1372  |
| HA-ADH <sub>2.33</sub> HA-Ox <sub>1.00</sub> (100 kDa) vs. HA-ADH <sub>1.00</sub> HA-Ox <sub>1.67</sub> (100 kDa) | ns | 0.8311  |
| HA-ADH <sub>2.33</sub> HA-Ox <sub>1.00</sub> (100 kDa) vs. HA-ADH <sub>1.00</sub> HA-Ox <sub>1.00</sub> (100 kDa) | ns | >0.9999 |
| HA-ADH <sub>2.00</sub> HA-Ox <sub>2.00</sub> (100 kDa) vs. HA-ADH <sub>1.67</sub> HA-Ox <sub>3.00</sub> (100 kDa) | ns | 0.6715  |
| HA-ADH <sub>2.00</sub> HA-Ox <sub>2.00</sub> (100 kDa) vs. HA-ADH <sub>1.00</sub> HA-Ox <sub>3.00</sub> (100 kDa) | ns | 0.0946  |
| HA-ADH <sub>2.00</sub> HA-Ox <sub>2.00</sub> (100 kDa) vs. HA-ADH <sub>1.00</sub> HA-Ox <sub>1.67</sub> (100 kDa) | ns | 0.7148  |
| HA-ADH <sub>2.00</sub> HA-Ox <sub>2.00</sub> (100 kDa) vs. HA-ADH <sub>1.00</sub> HA-Ox <sub>1.00</sub> (100 kDa) | ns | 0.9969  |
| HA-ADH <sub>1.67</sub> HA-Ox <sub>3.00</sub> (100 kDa) vs. HA-ADH <sub>1.00</sub> HA-Ox <sub>3.00</sub> (100 kDa) | ns | 0.1566  |
| HA-ADH <sub>1.67</sub> HA-Ox <sub>3.00</sub> (100 kDa) vs. HA-ADH <sub>1.00</sub> HA-Ox <sub>1.67</sub> (100 kDa) | ns | 0.998   |
| HA-ADH <sub>1.67</sub> HA-Ox <sub>3.00</sub> (100 kDa) vs. HA-ADH <sub>1.00</sub> HA-Ox <sub>1.00</sub> (100 kDa) | ns | 0.9992  |
| HA-ADH <sub>1.00</sub> HA-Ox <sub>3.00</sub> (100 kDa) vs. HA-ADH <sub>1.00</sub> HA-Ox <sub>1.67</sub> (100 kDa) | ns | 0.7591  |
| HA-ADH <sub>1.00</sub> HA-Ox <sub>3.00</sub> (100 kDa) vs. HA-ADH <sub>1.00</sub> HA-Ox <sub>1.00</sub> (100 kDa) | ns | 0.3106  |
| HA-ADH <sub>1.00</sub> HA-Ox <sub>1.67</sub> (100 kDa) vs. HA-ADH <sub>1.00</sub> HA-Ox <sub>1.00</sub> (100 kDa) | ns | 0.9872  |

**Table S5. Summary of significance for 40 kDa HA mass change and 100 kDa HA mass change.** A summary of significance for the mass change for both 40 kDa and 100 kDa is listed, a two-way ANOVA post-hoc Tukey's multiple comparisons was performed. n = 3; \* p < 0.05, \*\* < p 0.01, \*\*\* p < 0.001, \*\*\*\* p < 0.0001.

### Effect of Hydrogel Size on Gelation Time

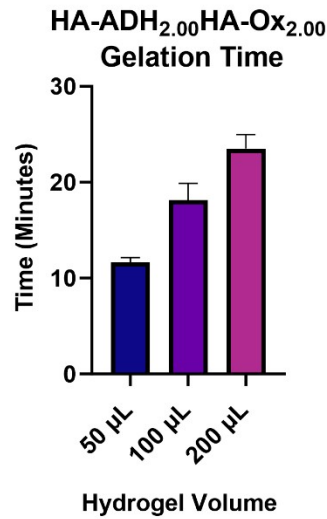

**Figure S3. Gelation time of HA-ADH<sub>2.00</sub>HA-Ox<sub>2.00</sub> hydrogels of different volumes.** Gelation times of HA-ADH<sub>2.00</sub>HA-Ox<sub>2.00</sub> hydrogels were evaluated at 50, 100, and 200 µL to determine the effect of hydrogel size on gelation time. As the hydrogel volume increased, the gelation time increased.

### Compressive Modulus

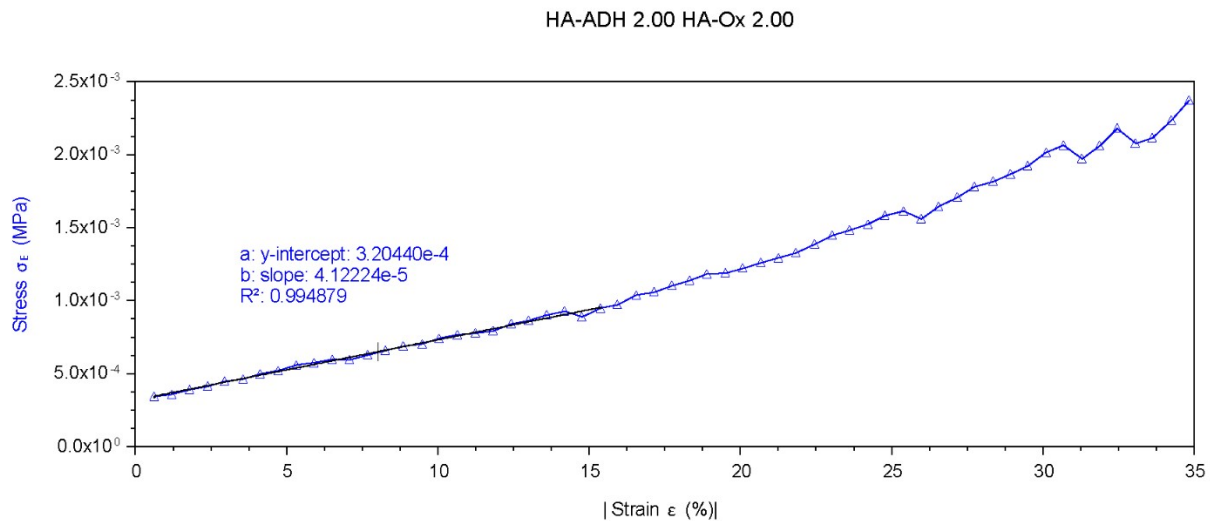

**Figure S4. Stress-strain curves of HA hydrogels.** Representative stress-strain curve of the centrally repeated HA hydrogel formulation HA-ADH<sub>2.00</sub>HA-Ox<sub>2.00</sub>. The slope of stress-strain curves at 15% strain was used to determine the compressive moduli of the HA hydrogels.

## Hydrogel Morphology

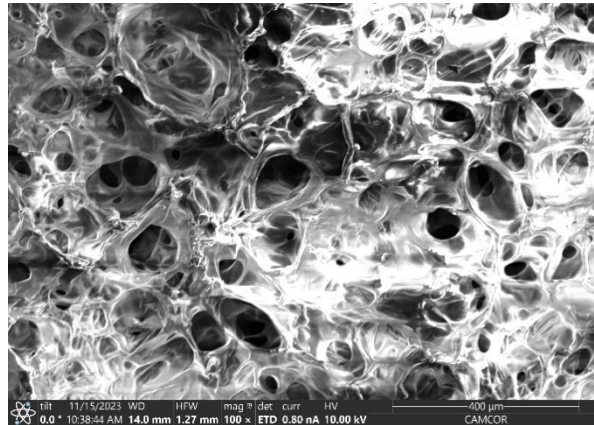

**Figure S5. Scanning electron microscopy images of optimal hydrogel.** Representative image of optimal hydrogel formulation, HA-ADH<sub>3.00</sub>HA-Ox<sub>2.33</sub>, depicting the porous morphology of the hydrazone-crosslinked HA hydrogel. Scale bar = 400  $\mu$ m.

## Affibody Bioconjugation

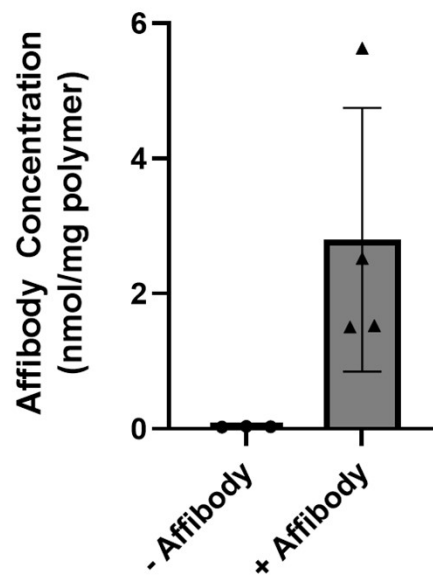

**Figure S6. Quantification of affibody conjugation on HA-Nor-Ox-Affibody polymer.** Pierce 660 Protein Assay was used to measure the amount of affibody conjugated per mg of HA-Nor-Ox-Affibody polymer and compared to HA-Nor-Ox polymer without conjugated affibodies as a control.
